# Supplementary material for: Climatic factors contributing to long-term variations of fine dust concentration in the United States
Source: Copernicus journal article supplement (doi:10.5194/acp-2017-821), 2017-09-22
Supplement: Supplementary file [file acp-2017-821-RC2-supplement.pdf]

1  
2  
3  
4  
5  
6  
7  
8  
9  
10  
11  
12  
13  
14  
15  
16  
17  
18  
19  
20  
21  
22  
23

Climatic factors contributing to long-term variations of fine dust concentration in the  
United States

Bing Pu<sup>1,2</sup> and Paul Ginoux<sup>2</sup>

<sup>1</sup>Atmospheric and Oceanic Sciences Program, Princeton University,  
Princeton, New Jersey 08544

<sup>2</sup>NOAA Geophysical Fluid Dynamics Laboratory, Princeton, New Jersey 08540

*Correspondence to:* Bing Pu ([bpu@princeton.edu](mailto:bpu@princeton.edu))

**Abstract.** High concentration of dust particles can cause respiratory problems and increase non-accidental mortality. Studies found fine dust (with aerodynamic diameter less than 2.5 microns) is an important component of the total PM<sub>2.5</sub> mass in the western and central U.S. in spring and summer and has positive trends. This work examines factors influencing long-term variations of fine dust concentration in the U.S. using station data from the Interagency Monitoring Protected Visual Environments (IMPROVE) network during 1990-2015. The variations of the fine dust concentration can be largely explained by the variations of precipitation, surface bareness, and 10 m wind speed. Moreover, including convective parameters such as convective inhibition (CIN) and convective available potential energy (CAPE) better explains the variations and trends over the Great Plains from spring to fall.

While the positive trend of fine dust concentration in the Southwest in spring is associated with precipitation deficit, the increasing of fine dust over the central Great Plains in summer is largely associated with an enhancing of CIN and a weakening of CAPE, which are related to increased atmospheric stability due to surface drying and lower troposphere warming. The positive trend of the Great Plains low-level jet also contributes to the increasing of fine dust concentration in the central Great Plains in summer via its connections with surface winds and CIN.

Summer dusty days in the central Great Plains are usually associated with a westward extension of the North Atlantic subtropical high that intensifies the Great Plains low-level jet and also results in a stable atmosphere with subsidence and reduced precipitation.

## 1. Introduction

Mineral dust is one of the most abundant atmospheric aerosols by mass. It is lifted to the atmosphere by strong wind from dry and bare surfaces. Severe dust storms have far-reaching socioeconomic impacts, affecting public transportation and health (e.g., Morman and Plumlee, 2013) by degrading visibility, causing traffic accidents, breathing problems, and lung diseases. Dust storms are found to be associated with increases in non-accidental mortality in the U.S. during 1993-2005 (Crooks et al., 2016).

Major dust sources in the United States are located over the western U.S., where several deserts are located, e.g., the Mojave, Sonoran, and northern Chihuahuan deserts, and over the central U.S., where the dust sources are largely anthropogenic, in association with agriculture activities (Ginoux et al., 2012). Climate models project a drying trend in the late half of the twenty-first century over the southwest and central U.S. (e.g., Seager et al., 2007; Cook et al., 2015), regions largely collocated with the major dust sources in the U.S. This raises questions such as how future dust activities will change in the U.S. To project future dust variations, we first need to understand how dust activity varies in the present day. Pu and Ginoux (2017) explored this question using dust optical depth (DOD) derived from MODIS Deep Blue (M-DB2) aerosol products during 2003-2015 and found that variations of dust activity are largely associated with precipitation, near surface wind speed, and surface bareness.

While DOD describes the total optical depth of dust aerosols with different sizes and is widely used to study climate-dust interactions, fine dust with aerodynamic diameter less than 2.5  $\mu\text{m}$  is more frequently used for air quality purposes. The diameter of dust aerosols usually ranges from 0.1 to 50  $\mu\text{m}$  (Duce, 1995), with measured volume

median diameters varying from 2.5 to 9  $\mu\text{m}$  (Reid et al., 2003) and clay (diameter  $< 2 \mu\text{m}$ ) mass fraction representing less than 10% (Kok, 2011). In terms of air quality, fine dust contributed about 40-50% of total Particulate Matter 2.5 (PM<sub>2.5</sub>) mass over the southwestern U.S. in spring and about 20-30% over the southwestern to central U.S. in summer (Hand et al., 2017).

Stations in the network of the Interagency Monitoring of Protected Visual Environments (IMPROVE) have collected PM<sub>2.5</sub> samples in the U.S. since 1988 (Malm et al., 1994; Hand et al., 2011). Analysis of chemical elements is used to derive fine dust concentration. Due to its long temporal coverage, this dataset has been widely used to study long-term variations of fine dust in the U.S. Using IMPROVE data, Hand et al. (2016) found an increasing trend of fine dust in spring in the southwestern U.S. during 1995-2014 and related this trend to a negative Pacific decadal oscillation (PDO) from 2007 to 2014. Tong et al. (2017) also found a rapid increase of dust storm activity in the Southwest from 1988 to 2011 and related the trend to sea surface temperature variations in the Pacific. Later, Hand et al. (2017) examined the trends of IMPROVE fine dust concentration in different seasons from 2000 to 2014 and found positive trends over the southwestern U.S. in spring and over the central U.S. in summer and fall. Similarly, Zhang et al. (2017) also found a positive trend of fine dust over the central U.S. from 2005 to 2015 and suggested this trend may contribute to the increase of absorbing aerosol optical depth in the region. Nonetheless, the possible causes of the fine dust trends, especially the increase of fine dust over the central U.S., have not been thoroughly discussed by previous studies. Here, we explore the underlying factors driving the long-term variations of fine dust from 1990 to 2015. We start with local environmental factors



and then examine the possible influence of the low-level jet over the Great Plains on fine dust concentration in summer.

The following section describes the data and analysis method used in the paper. Section 3 presents our major results and conclusions are summarized in Section 4.

## **2. Data and Methodology**

### **2.1 IMPROVE fine dust**

IMPROVE stations are located in National Parks and wilderness areas in the United States, with PM<sub>2.5</sub> sampling performed every third day since March 1988. Records from 204 stations within a domain of 15°-53°N and 60°-127°W are used in this study, and most of the stations contain data longer than 10 years (Fig. S1 in the Supplement). Elemental concentration is determined from X-ray fluorescence, and fine dust concentration is calculated using the concentrations of aluminum (Al), silicon (Si), calcium (Ca), iron (Fe), and titanium (Ti) by assuming oxide norms associated with predominant soil species (Malm et al., 1994; their Eq. 5). More details regarding IMPROVE stations, sampling, and analysis method can be found in previous studies (Hand et al., 2011;2012; 2016;2017).

We averaged daily station data to monthly means and then interpolated them to a 0.5° by 0.5° grid using inverse distance weighted interpolation, i.e., weights depending on the inverse cubic distance between the site location and the interpolated grid point. In daily composite analysis, daily station data are interpolated to a 0.5° by 0.5° grid using the same method.

Following Pu and Ginoux (2017), several dusty regions are selected for analysis. The southwestern U.S. (WST for short; 32°-42°N, 105°-124°W) and Great Plains (GP for short; 25°-49°N, 95°-105°W) cover the major dust source regions (black boxes in Fig. 1), while the central Great Plains (32°-40°N, 95°-102°W) is chosen to examine the increasing trend of fine dust in the region.

## 2.2 Cloud-Aerosol Lidar with Orthogonal Polarization (CALIOP) products

CALIOP is the two-wavelength polarization lidar carried by Cloud-Aerosol Lidar and Infrared Pathfinder Satellite Observation (CALIPSO) satellite, which was launched in April 2006 (Winker et al., 2004;2007). CALIOP measures backscattered radiances attenuated by the presence of aerosols and clouds, whose microphysical and optical properties are retrieved. Daily products are available since June 2006. To examine the vertical profile of dust concentration in the U.S., the daily 532 nm total attenuated backscatter from Level 1 product and depolarization ratio from Level 2 product are used. Depolarization ratio can be used to separate spherical and non-spherical hydrometeors and aerosols (Sassen, 1991), and  $\geq 0.2$  is used to separate non-spherical dust from other aerosols (Li et al., 2010).

## 2.2 Precipitation

The Precipitation Reconstruction over Land (PRECL; Chen et al., 2002) from the National Oceanic and Atmospheric Administration (NOAA) is a global analysis available monthly from 1948 to present at a 1° by 1° resolution, and is suitable to study long-term connections between fine dust and precipitation. The dataset is derived from gauge

observations from the Global Historical Climatology Network (GHCN), version 2, and the Climate Anomaly Monitoring System (CAMS) datasets. Monthly precipitation from 1990 to 2015 is used.

### 2.3 Leaf area index (LAI)

Monthly LAI derived from the version 4 of Climate Data Record (CDR) of Advanced Very High Resolution Radiometer (AVHRR) surface reflectance (Claverie et al., 2014) and produced by the National Aeronautics and Space Administration (NASA) Goddard Space Flight Center (GSFC) and the University of Maryland is used. The gridded monthly data are on a 0.05° by 0.05° horizontal resolution and available from 1981 to present. This dataset is selected due to its high spatial resolution and long temporal coverage. Monthly data from 1990 to 2015 are used. A detailed discussion on the algorithm and evaluation of the dataset can be found by Claverie et al. (2016).

Surface bareness is derived from seasonal mean LAI, and is calculated following Pu and Ginoux (2017),

$$Bareness = -\exp(LAI) \quad . \quad (1)$$

### 2.4 Reanalysis

North American Regional Reanalysis (NARR; Mesinger et al., 2006) provides 3-hourly, daily, and monthly meteorological variables from 1979 to the present at a high spatial resolution (i.e., about 32km horizontally). Precipitation in the NARR is assimilated with observations. The reanalysis reasonably captures the hydroclimatic fields in the continental U.S. on multiple time scales (Ruiz-Barradas and Nigam, 2006;

Ruane, 2010a, b), thus is suitable to study the connection between fine dust concentration and local hydroclimatic variables. Here daily and monthly convective variables such as convective inhibition (CIN), and convective available potential energy (CAPE) are used. CIN is defined as the energy that a parcel needs to overcome to rise above the level of free convection (LFC), and is usually written as:

$$CIN = - \int_{P_{sfc}}^{P_{LFC}} R_d (T_{vp} - T_{ve}) d \ln p \quad , \quad (2)$$

where  $P_{LFC}$  is the pressure at LFC,  $P_{sfc}$  is the pressure at the surface,  $R_d$  is the specific gas constant for dry air,  $T_{vp}$  is the virtual temperature of the lifted parcel, and  $T_{ve}$  is the virtual temperature of the environment. ~~By definition~~, CIN is usually a negative variable, with bigger CIN (in absolute value) indicating greater inhibition. On the other hand, CAPE describes the positive buoyancy of an air particle from the LFC to the equilibrium level (neutral buoyancy), and can be written as:

$$CAPE = - \int_{P_{LFC}}^{P_{EL}} R_d (T_{vp} - T_{ve}) d \ln p \quad , \quad (3)$$

where  $P_{EL}$  is the pressure at the equilibrium level. Both CIN and CAPE describe the stability of the atmosphere, and usually convection easily occurs when CAPE is high and CIN is low (in absolute value; e.g., Colby, 1984; Riemann-Campe et al., 2009; Myoung and Nielsen-Gammon, 2010a). Note the two variables can sometimes vary in opposite directions. Indeed, when CAPE is high, strong inhibition may still prohibit the occurrence of deep convection.

In addition, daily and monthly means of horizontal wind speed at 900 hPa, temperature at 700 hPa ( $T_{700}$ ), 10 m wind speed, dew point temperature ( $T_{dp}$ ), and 2 m air temperature ( $T_{2m}$ ), total cloud cover, total and convective precipitation are used.

Another reanalysis used in this work is the ERA-Interim (Dee et al., 2011) from the European Centre for Medium-Range Weather Forecasts (ECMWF). ERA-Interim is a global reanalysis with a horizontal resolution of T255 (about  $0.7^\circ$  or 80 km) and 37 vertical levels, available from 1979 to present. It complements the regional reanalysis by providing a larger domain to analyze circulation variations and also a few surface variables that are not available in the NARR. 6-hourly analysis and 3-hourly forecast variables such as surface turbulence stress, vertical and horizontal winds, air temperature, and specific humidity from 1000 to 200 hPa, 850 hPa winds and geopotential height are used to calculate daily means of these variables.

## 2.5 Multiple-linear regression

To understand the connection between the potentially controlling factors and the variation of fine dust concentration, multiple-linear regressions are applied by regressing the observed gridded fine dust concentration onto 3, 4, or 5 standardized controlling factors, a method similar to the one used by Pu and Ginoux (2017). Here all data are interpolated to a  $1^\circ$  by  $1^\circ$  grid for the regression analysis. The fine dust concentration is then reconstructed by using the regression coefficients and observed variations of the controlling factors (such as precipitation, surface wind, and bareness). We focus our analysis on two statistical properties: correlations of regional averaged time series and pattern correlations for the trends. These two properties are calculated for both observed and regression model estimated (i.e., reconstructed) fine dust concentrations.

## 3. Results

### 3.1 Trends of surface fine dust concentration during 1990-2015 and local controlling factors

Figure 1 shows the trend of fine dust concentration from gridded data (shading) and also those from stations with at least 23 years of consecutive records (colored circles) from 1990 to 2015. Significant positive trends are found over the southwestern U.S. in spring (MAM), over the central to southern Great Plains in summer (JJA), and the northern Great Plains in fall (SON). Dust concentration also increases over southwestern Arizona (up to  $0.06 \mu\text{g m}^{-3} \text{ yr}^{-1}$ ), by about 2.5% of its climatological value (Fig. S2 in the Supplement) per year, in all seasons. A similar increasing trend of fine dust in southern Arizona in spring from 1988 to 2009 is also noticed by Sorooshian et al. (2011). A decreasing trend is found over the northeastern U.S. in all seasons as well. The pattern is somewhat similar to the trend identified by Hand et al. (2017; their Fig. 9) for 2000-2014, who also found increasing trends of fine dust in the Southwest in spring and the central Great Plains in summer.

As suggested by previous studies, the trend of fine dust may be biased due to suspicious trends in some chemical species (Al, Si, and Ti) used to construct fine dust in association with changes of analytical methods (e.g., Hyslop et al., 2015; Hand et al., 2016; Hand et al., 2017). Fe has been suggested as a good proxy of fine dust since it's more stable and is a key component of dust (Hand et al. 2016; 2017). We examined the trend of fine Fe (Fig. S3 in the Supplement), and found the pattern is very similar to the trend of fine dust. In fact, we found the correlations between seasonal mean fine dust and Fe (both gridded data and long-term stations) are around 0.90 (significant at the 99% confidence level) in most part of the U.S. during 1990-2015 (Fig. S4 in the Supplement).

229 This suggests the trends revealed directly from fine dust record are comparably reliable  
230 as those calculated from Fe. So we use fine dust concentration for this analysis.

231 What are the dominant factors influencing the variations of fine dust  
232 concentration? Hand et al. (2016) found that the PDO played an important role in the  
233 variability of fine dust concentration over the Southwest in March by creating a windier,  
234 drier, and less vegetated environment. We would like to extend their analysis to other  
235 seasons and regions. In addition, we focus on identifying key controlling factors at the  
236 local level because remote forcings such as the PDO influence dust variations through  
237 their tele-connection with local controlling factors. Pu and Ginoux (2017) found that  
238 local precipitation, surface bareness, and surface wind speed could explain 49% to 88%  
239 of the variances of dust event frequency (derived from DOD) over the western U.S. and  
240 the Great Plains in different seasons from 2003 to 2015. We first examine to what extent  
241 these factors can explain the variance of near surface fine dust concentration. Similar to  
242 Pu and Ginoux (2017), we do not separate the contribution from local emissions or  
243 remote transportation to the fine dust concentration, although contributions from Asian  
244 dust in spring over the western U.S. (Fischer et al., 2009; Creamean et al., 2014; Yu et al.,  
245 2012) and from North African dust in summer over the southeastern U.S. (Perry et al.,  
246 1997; Prospero, 1999b) have been observed.

247 Figure 2a-d shows the dominant controlling factor among ~~the three~~ (precipitation,  
248 surface wind, and bareness) for fine dust concentration variations at each grid point.  
249 Precipitation plays an important role in most parts of the southern U.S. in winter. In  
250 spring, surface wind starts to dominate the variations of fine dust along the Gulf coast and  
251 eastern Great Plains, consistent with the intensification of the Great Plains low-level jet

(e.g., Helfand and Schubert, 1995; Weaver and Nigam, 2008; Pu and Dickinson, 2014; Pu et al., 2016) in April and May, while bareness is important over the western Great Plains and the Midwest. During summer, the influence of surface wind speed gets stronger, especially over western Arizona and the lower Mississippi basin, whereas bareness and precipitation are also important in many parts of the Great Plains and western U.S. Precipitation becomes the dominant factor over most parts of the U.S. again in fall, with surface winds playing a weak role over the southeast and northeast coasts.

The regression coefficients obtained here share some similarity with those shown by Pu and Ginoux, (2017; their Fig 4) using DOD, e.g., the importance of surface bareness in the Great Plains in spring and summer. However, there are also quite large differences, likely due to different periods of regression and the fact that the DOD and surface fine dust concentration are not always linearly related to each other (Fig. S5 in the Supplement). For instance, over the Great Plains and the southwestern U.S., seasonal mean fine dust is linearly related to the DOD in spring but not so in summer. As mentioned earlier, fine dust covers a small fraction of the total mass distribution of dust particles, thus the connections between fine dust concentration and the controlling factors could be different from those with the DOD. For example, the scavenging effect of precipitation is more efficient on small particles (e.g., Zender et al., 2003) and as a result precipitation generally plays an overall more important role on fine dust variations than on the DOD, especially in winter, spring, and fall.

The correlations between reconstructed fine dust concentration in the southwestern U.S. (using regression coefficients and observed variations of precipitation, surface wind, and bareness) and that from the IMPROVE range from 0.69 in fall to 0.82



in winter, indicating that the above three factors explain about 48% to 67% variances of fine dust in the Southwest from 1990 to 2015. Over the Great Plains, correlations between the reconstructed and observed fine dust concentration ranges from 0.57 in summer to 0.69 in winter, explaining 32% to 48% variances statistically, lower than over the Southwest.

The pattern correlations between the observed trend and the trend from reconstructed fine dust are all above 0.80 in the Southwest except in the summer, whereas in the Great Plains region, the pattern correlations are much lower, from 0.06 in fall to 0.48 in winter. In fact, the reconstructed trend missed the observed positive trend of fine dust over the central Great Plains in summer (not shown). This is consistent with the low confidence level of the regression coefficients over the central Great Plains in summer (Fig. 2c) and indicates that the above three factors are not sufficient to well explain the variations of fine dust in the central Great Plains.

The development of dust storms has long been related to convection and atmospheric stability (e.g., Marsham et al., 2008;Cuesta et al., 2009). Here we examine whether the variances of fine dust concentration and trend can be better represented by adding CIN (i.e., four-factor) and both CIN and CAPE (i.e., five-factor) in addition to the three factors (i.e., three-factor) discussed above.

Figure 2e shows correlations (blue bars) between the observed and the reconstructed regional mean fine dust concentration from three-, four-, and five-factor regressions, and corresponding pattern correlations (pink dots) between trends from the observed and reconstructed fine dust for the Great Plains and the southwestern U.S. In both regions, correlations of interannual variation between the reconstructed and

observed fine dust are slightly improved from three-factor regression to five-factor regression. Pattern correlations are largely improved over the Great Plains when including CIN and CAPE, especially in spring (from 0.30 to 0.89) and summer (from 0.34 to 0.93), although slightly decreased in winter, whereas the improvement of pattern correlations in the Southwest is much weaker.

The collinearity among the factors used in the multiple linear regression can be examined by the variance inflation factor (VIF; O'Brien, 2007; Abudu et al., 2011), and usually values between 5 and 10 are considered high collinearity and the results of regression are less reliable. Increasing the number of predictors in multiple linear regression generally increase VIFs. The VIFs for three-factor regression are around 1 and 2 in most areas, with a few spots around 3 (not shown), while the VIFs for five-factor regression are slightly higher, especially for CIN and CAPE over the Southwest (Figs. S6 and 7 in the Supplement). The increase of VIF and relatively weak improvement in the correlations in the Southwest when adding the convective factors suggest that three factors (precipitation, surface wind and bareness) are sufficient to capture the variations and trend of fine dust in the region. Over the Great Plains, adding CIN and CAPE can better explain the variations.

We now examine key factors driving the observed positive trends of fine dust concentration in spring and summer, the dustiest seasons (Fig. S2 in the Supplement), based on the above analysis. Figure 3a show the trend of observed and reconstructed fine dust concentrations in spring along with three components contributed to the reconstructed trend (i.e., from precipitation, bareness, and surface wind). The reconstructed trend (Reg (all)) largely captures the positive trend in the Southwest shown

in the observation (Obs). Among the three factors, precipitation plays the most important role in contributing to the positive trend over the Southwest, consistent with its dominant role in explaining observed interannual variability (Fig. 2b). The increase of fine dust is mainly associated with a decreasing trend of precipitation in the Southwest (Fig. 3b). Such a drying trend has been related to an increase of anticyclonic conditions in the North East Pacific (Prein et al., 2016) and an intensification of Pacific trades during 2002-2012 (Delworth et al., 2015).

The reconstructed summer trend using coefficients from five-factor regression is very similar to the observation, with a pattern correlation of 0.95 in the domain (Fig. 4a). The positive trend over the central Great Plains is largely contributed by CIN, with a positive center at northern Texas, western Kansas, and Oklahoma. Parts of the positive trend over Oklahoma and western Kansas are contributed by CAPE. In fact, both CIN and CAPE have significant negative trends over the central Great Plains, although the trend of CAPE is slightly weaker than that of CIN (Fig. 4b). A decrease of CIN (i.e., an increase in its absolute value) denotes an increasing inhibition of convection, while a weakening of CAPE denotes a decreasing instability associated with moist convection. Note that CIN is also significantly negatively correlated with fine dust concentration on interannual time scale ( $r = -0.39$ ,  $p = 0.05$ ). This again indicates that CIN plays a more important role than CAPE in the recent positive trend of fine dust.

Both the trends of the CIN and CAPE denote an increasing of atmospheric stability. Changes of CIN and CAPE have been related to boundary layer or near-surface temperature and moisture (e.g., Ye et al., 1998; Gettelman et al., 2002; Alappattu and Kunhikrishnan, 2009). Myoung and Nielsen-Gammon (2010b) found that the variations

of CIN over Texas in the warm season can be well represented by the differences of temperature at 700 hPa ( $T_{700}$ ) and surface dew point temperature ( $T_{dp}$ ), i.e.,  $T_{700}-T_{dp}$ . While  $T_{700}$  is a good proxy for temperature at the free-troposphere below the LFC,  $T_{dp}$  denotes the dryness at the surface. Thus,  $T_{700}-T_{dp}$  represents a joint effect of surface drying and warming at 700 hPa, a generally stable atmosphere. Here we find both CIN and CAPE have significant negative correlations with  $T_{700}-T_{dp}$  over the central Great Plains (Fig. 4c). A significant positive trend of  $T_{700}-T_{dp}$  is also found, supporting the assumption that the atmospheric stability is enhanced during the period. Such a changes of stability is largely due to the increase of  $T_{700}$ , although surface drying also contributes.

CIN is also found to be significantly correlated with rain days (daily precipitation  $\geq 1$  mm day<sup>-1</sup>) in summer in Texas (Myoung and Nielsen-Gammon, 2010b). Here a similar positive correlation between CIN and rain days in the central Great Plains is also found from 1990 to 2015 ( $r=0.79$ ,  $p<0.001$ ), suggesting that CIN could influence fine dust concentration via its connection with rain days. A stable atmosphere prevents deep moist convection, which reduces the chance of scavenging by precipitation, and also likely prevents dilution of fine dust concentration in the boundary layer with the clean air above through convective mixing. The connection underlying CIN and fine dust concentration is further discussed in section 3.3 using daily data.

### **3.2 The connection between the Great Plains low-level jet and summertime fine dust variations in the central Great Plains (CGP)**

An important feature related to the moisture and heat transport and precipitation in the Great Plains from late spring to summer is the Great Plains low-level jet (LLJ),

which develops in April and reaches its maximum wind speed in June and July at around 900 hPa (e.g., Weaver and Nigam, 2008; Pu et al., 2016). The southerly jet covers most of the southern to central Great Plains, and turns into a westerly around 40° N passing through the Midwest. How this jet may influence the dust concentration in the CPG in summer is examined here.

Figure 5a shows the time series of the jet index in summer following the definition of Weaver and Nigam (2008) by averaging 900 hPa meridional wind speed at the jet core (25°-35°N, 97°-102°W) from 1990 to 2015. The jet index is significantly positively correlated with fine dust concentration in the CGP ( $r = 0.56$ ,  $p < 0.01$ ) and also has a significant positive trend in summer, suggesting that the jet also contributes to the increasing of fine dust in the CGP. Such a positive connection between the jet and fine dust concentration can be explained by jet's negative correlation with CIN and positive correlation with the near surface wind speed in the CGP (Figs. 5b). An intensified jet increases the near surface wind speed and meanwhile increases the stability of atmosphere over the CGP by advecting moisture away to the Midwest and increasing local temperature via northward warm temperature advection (e.g., Walters and Winkler, 2001; Song et al., 2005; Zhu and Liang, 2013).

Because most of the IMPROVE sites (4 out of 6) in the central Great Plains only have records since 2002, correlations between the jet index and fine dust concentration, CIN, and surface wind for 2002-2015 are also calculated (Fig. 5c). The patterns are similar to those during 1990-2015.

Dust from Africa can be transported to the southeastern U.S. and even Texas in summer (e.g., Perry et al., 1997; Prospero, 1999a, b; 2010; 2014; Bozlaker et al., 2013).

Does African dust also contribute to the positive trend of fine dust in the CGP via the jet? Fully addressing this question will require a dust model that can well reproduce the emission and transport processes of African dust, which is beyond the scope of this paper. Here we discuss this question based on observational analysis. The regression and trend analysis above suggests that local atmospheric stability largely contributes to the positive trend. Since African dust is transported to the continental U.S. passing through the Caribbean Sea and the Gulf of Mexico, we assume that the variations of fine dust in stations nearby would reveal the influence of African dust. Two of such stations, VIIS1 (18.3°N, 64.8°W) in the Virgin Islands National Park and EVER1 (25.4°N, 80.7°W) in the Everglades National Park, are used. It is found that the records from these stations have significantly positive correlations with fine dust concentration over the southeastern U.S. in JJA, but not over the CGP (Fig. S8 in the Supplement). This suggests that the influence of African dust is largely over the Southeast on seasonal mean, consistent with the results of Hand et al. (2017), who found the influence of North African dust are mainly over the Southeast, Appalachia, and Virgin islands regions in summer as indicated by a shift of elemental composition in IMPROVE sites.

### **3.3 Factors contributing to high dust concentration over the CGP in summer**

While the negative correlation between fine dust concentration and precipitation in the Southwest is straightforward, the correlation between fine dust and CIN in the CGP is less obvious. Here we further examine the connection between fine dust and CIN and other factors associated with high dust concentration in the area using daily events. As

mentioned earlier, since most stations in the CGP have records since 2002, the following analysis focuses on summer during 2002-2015.

### 3.3.1 Connection between fine dust concentration and CIN

Figures 6a-c show the scatter plot of standardized (means are removed and then divided by one standard deviation) CIN and friction velocity ( $U^*$ ) anomalies, for all the days in summer from 2002 to 2015, days when IMPROVE records are available (431 days), and dusty days, defined as days when daily anomaly of IMPROVE observation is greater than one standard deviation (52 days), respectively.  $U^*$  is defined as the following,

$$U^* = ([\tau/\rho])^{1/2} = [(\overline{u'w'})^2 + (\overline{v'w'})^2]^{1/4} , \quad (4)$$

where  $\tau$  is the Reynolds stress and  $\rho$  is air density, and  $\overline{u'w'}$  and  $\overline{v'w'}$  are vertical flux of horizontal momentum. We calculated  $U^*$  using the surface turbulence stresses ( $-\rho\overline{u'w'}$ ,  $-\rho\overline{v'w'}$ ) from the ERA-Interim.  $U^*$  has long been related to dust emission (e.g., Gillette and Passi, 1988; Marticorena and Bergametti, 1995; Zender et al., 2003). As shown in Fig. 6, CIN is significantly negatively related to the friction velocity, which is associated with turbulent fluctuations in the boundary layer. This indicates a large negative CIN, or great inhibition for convection, is related to stronger near surface turbulence fluxes and  $U^*$ . Such a negative connection is robust both in days with fine dust records and in dusty days. CIN represents the integrated inhibition from the surface to LFC (Eq. 2), then how does CIN relate to surface turbulence fluxes and  $U^*$ ?

In the CGP, CIN is significantly negatively correlated with near surface temperature,  $T_{2m}$ , i.e., a strong inhibition is associated with higher  $T_{2m}$ , for all days in JJA

and for days when fine dust records are available (Table 1). This is consistent with previous study over Texas (Myoung and Nielsen-Gammon, 2010b). Meanwhile,  $U^*$  is significantly positively correlated with  $T_{2m}$  (Table 1), indicating that CIN is connected with  $U^*$  via its connection with near surface temperature. Also, note such a connection seems not valid during dusty days (correlation between  $T_{2m}$  and  $U^*$  is not significant). Similarly, we found a close connection among CIN,  $T_{700}-T_{dp}$ , and  $U^*$  (Table 1). This again, suggests that CIN can influence  $U^*$  via its connection with surface variables such as temperature and dryness. Variables in Table 1 are all from the ERA-Interim (except CIN) to be consistent with  $U^*$ , results are similar if using NARR variables.

One hypothesis for the connection between CIN and  $U^*$  for dusty days is shown in Table 2. A significant positive correlation between CIN and vertical wind at 850 hPa ( $w_{850}$ ) is found, indicating that when the inhibition is strong, it favors subsidence. This is consistent with the finding by Riemann-Campe et al. (2009) who found in climatology high CIN value is located over subtropical regions with strong subsidence. The subsidence may transports momentum downward and promotes  $U^*$ . This is consistent with the negative correlation between  $U^*$  and  $w_{850}$  (Table 2). However, we also notice that the above connections in dusty days are not valid in the NARR, suggesting further investigation on this mechanism is needed.

Despite the connection between CIN and surface variables, the possible mechanism that strong inhibition prevents dilution is also examined. We found four examples in CALIOP snapshots over the CGP when the daily anomaly of near surface fine dust concentration from the IMPROVE network is greater than one standard deviation. Figure 7 shows nighttime 532 nm total attenuated backscatter (shading) on



August 10<sup>th</sup>, 2007 (top) and on June 21<sup>st</sup>, 2013 (bottom). Black contours show area with depolarization ratio  $\geq 0.2$ , denoting dust aerosols. In both cases, the inhibition is quite strong, with CIN anomaly greater than one standard deviation. The difference between the two cases is that on June 21<sup>st</sup>, 2013, CAPE is higher, which leads to some convection as denoted by the clouds above. However, in both cases, with strong inhibition, dust particles are largely located in a layer between the surface and 2 km. Figure 8 shows a different situation when CIN has positive anomaly (i.e., weak inhibition). In these cases, dust particle extends up to 4 km, and surface fine dust concentrations in the CGP (with anomalies of 2.3 and 2.1  $\mu\text{g m}^{-3}$ ) are also lower than those in Fig. 7 (with anomalies of 4.0 and 7.1  $\mu\text{g m}^{-3}$ ). Nonetheless, more cases are needed to further verify this mechanism.

### 3.3.2 Large-scale circulation pattern in dusty days

Figure 9 shows the daily composites of related metrological variables in dusty days, i.e., when daily anomaly of CGP fine dust concentration is greater than one standard deviation. Anomalous high fine dust concentration is associated with a reduced CIN (Fig. 9b) in the CGP, but not so much with CAPE (Fig. 9c). CAPE is anomalously enhanced over the northern Plains and the Midwest. Both the LLJ, near surface wind, and friction velocity are enhanced (Figs. 9d-f). Precipitation (mostly convective precipitation) in the CGP also decreases with reduced cloud cover, but increases in the north (Figs. 9g-i), consistent with enhanced CAPE there. These features are quite consistent with our analysis above on the favorable condition of enhanced fine dust in the CGP.

Figure 10 shows the composites of vertical velocity (shading), vertical and meridional wind vectors, specific humidity (purple contours), and potential temperature

(grey contours) zonally averaged over the central Great Plains ( $95^{\circ}$  - $102^{\circ}$  W), along with fine dust concentration (orange line). Anomalous dry subsidence is centered at  $30^{\circ}$ - $36^{\circ}$ N, with anomalous southerly winds at low-level associated with an intensified jet, while a rising motion of moist air is located around  $38$ - $42^{\circ}$ N with a maximum at 700-400 hPa. The dipole pattern of anomalous vertical velocity is consistent with the precipitation anomaly in the area (Figs. 9g-h). The anomalous potential temperature contour is quite uniform near the surface at  $30^{\circ}$ - $36^{\circ}$ N with an inversion around 700 hPa, indicating a well-mixed boundary layer in the region with increased fine dust.

What causes the changes of atmospheric stability, precipitation, and winds? Figure 11 shows the composites of  $T_{2m}$  and geopotential height and winds at 850 hPa during dusty days. Following Li et al. (2012a), 1560 gpm contour is used here to denote the western edge of the North Atlantic subtropical high in the 2002-2015 climatology (blue) and in dusty days (red). A westward extension of the subtropical high during dust days is quite evident, with enhanced geopotential height over the southeastern U.S. and the Gulf of Mexico (Fig. 11b). Such a westward extension of the subtropical high intensifies the LLJ by increasing the zonal pressure gradient, and also contributes to the anomalous precipitation and vertical velocity patterns, as similar patterns are found in previous studies associated with a westward extension of the subtropical high (e.g., Li et al., 2012a; their Figs. 3a and 4a). The formation of the North Atlantic subtropical high has been related to the land-sea heating contrast (Wu and Liu, 2003; Liu et al., 2004; Miyasaka and Nakamura, 2005; Li et al., 2012a; Li et al., 2012b). One possible reason of the westward extension of the subtropical high is the anomalous surface

warming over large part of the central and eastern U.S. (Fig. 11a) in dusty days that enhances the land-sea temperature gradient.

#### **4. Conclusions**

Fine dust is an important component in the total PM 2.5 mass in the western to central U.S. in spring and summer (Hand et al. 2017). Previous studies found positive trends of fine dust concentration in the southwestern U.S. in spring and the central U.S. in summer in the past 20 years (Hand et al., 2016;2017;Zhang et al., 2017), but the underlying causes are not clear, especially for the positive trend over the central U.S. This study examined local controlling factors associated with variations of fine dust concentration from Interagency Monitoring of Protected Visual Environments (IMPROVE) stations for 1990-2015 in each season. While precipitation, surface bareness, and wind speed largely control the variation of fine dust concentration in the southwestern U.S., including two convective parameters, convective inhibition (CIN) and convective available potential energy (CAPE) better explains the variations over the Great Plains from spring to fall. In particular, we found that the increasing trend of fine dust concentration over the Southwest in spring is associated with a significantly decreasing trend of precipitation, while the positive trend of fine dust over the central Great Plains (CGP) is largely due to enhanced atmospheric stability revealed by an enhancing of CIN (greater inhibition) and a decreasing of CAPE. Such a stability change is associated with surface drying and warming in the lower troposphere around 700 hPa, i.e., a positive trend of  $T_{700}-T_{dp}$ . A stable atmosphere prevents moist convection that can remove fine dust by in-cloud or precipitation scavenging and also likely prevent the

dilution of fine dust concentration by prohibiting convective mixing between the dusty boundary layer air and the clean air above.

The variations of the fine dust concentration in the CGP are also significantly correlated to the Great Plains low-level jet, with a stronger jet corresponding to higher fine dust concentration. Such a connection is largely due to jet's positive correlation with surface wind speed and negative correlation with CIN.

The influence of CIN on dust emission is examined using daily data in summer. It is found that CIN is significantly negatively related to surface friction velocity ( $U^*$ ), i.e., with greater inhibition in association with stronger  $U^*$ . Such a connection is largely due to CIN's connection with surface variables such as 2m temperature and dew point temperature. During dusty days, another possible connection is that the anomalous subsidence associated with strong inhibition may transport momentum downward and increase surface  $U^*$ .

Dusty days in the CGP in summer are associated with a westward extension of the North Atlantic subtropical high that intensifies the Great Plains low-level jet and surface wind speed, increases atmospheric stability, and also creates anomalous subsidence over the southern to central Great Plains and the Southeast and rising motion over the Midwest, and correspondingly a south-north dipole pattern of precipitation anomaly. The westward extension of the subtropical high is likely associated with the anomalous surface warming over the central to eastern U.S.

Our findings have important implications for future projections of fine dust variation in the U.S. Climate models have projected drying trends over the southwestern and the central U.S. (e.g., Seager et al., 2007; Cook et al., 2015) as well as an

intensification of the North Atlantic subtropical high (Li et al., 2012b) in the late 21<sup>st</sup> century, all favorable to an increase of fine dust in the Southwest and central Great Plains. Whether current increasing trends of fine dust will persist into the future requires further investigations that include factors not discussed here such as changes of anthropogenic land use, local synoptic-scale systems (e.g., cyclones and fronts), and remote forcings.

*Acknowledgements.*

IMPROVE is a collaborative association of state, tribal, and federal agencies, and international partners. US Environmental Protection Agency is the primary funding source, with contracting and research support from the National Park Service. The Air Quality Group at the University of California, Davis is the central analytical laboratory, with ion analysis provided by Research Triangle Institute, and carbon analysis provided by Desert Research Institute. IMPROVE fine dust data is downloaded from <http://views.cira.colostate.edu/fed/DataWizard/>. AVHRR leaf area index data are available at: <ftp://eclipse.ncdc.noaa.gov/pub/cdr/lai-fapar/files/>. PRECL Precipitation data are provided by the NOAA/OAR/ESRL PSD, Boulder, Colorado, USA, from their web site at <http://www.esrl.noaa.gov/psd/>. The CALIPSO products are downloaded from [https://www-calipso.larc.nasa.gov/tools/data\\_avail/dpo\\_read.php?y=2007&m=08&d=10](https://www-calipso.larc.nasa.gov/tools/data_avail/dpo_read.php?y=2007&m=08&d=10). The NCEP/NCAR reanalysis product is obtained from <http://www.esrl.noaa.gov/psd/data/gridded/data.ncep.reanalysis.html> and the ERA-Interim is downloaded from <http://www.ecmwf.int/en/research/climate-reanalysis/era-interim>. The NARR reanalysis is downloaded from <https://www.esrl.noaa.gov/psd/data/gridded/data.narr.html>. This research is supported by NOAA and Princeton University's Cooperative Institute for Climate Science and NASA under grant NNH14ZDA001N-ACMAP. The authors thank Drs. Stuart Evans and Jordan Schnell for their helpful comments on the early version of this paper.

## References

- Abudu, S., Cui, C. L., King, J. P., Moreno, J., and Bawazir, A. S.: Modeling of daily pan evaporation using partial least squares regression, *Sci China Technol Sc*, 54, 163-174, 10.1007/s11431-010-4205-z, 2011.
- Alappattu, D. P., and Kunhikrishnan, P. K.: Premonsoon estimates of convective available potential energy over the oceanic region surrounding the Indian subcontinent, *J Geophys Res-Atmos*, 114, 10.1029/2008jd011521, 2009.
- Bozlaker, A., Prospero, J. M., Fraser, M. P., and Chellam, S.: Quantifying the Contribution of Long-Range Saharan Dust Transport on Particulate Matter Concentrations in Houston, Texas, Using Detailed Elemental Analysis, *Environ Sci Technol*, 47, 10179-10187, 10.1021/es4015663, 2013.
- Chen, M. Y., Xie, P. P., Janowiak, J. E., and Arkin, P. A.: Global land precipitation: A 50-yr monthly analysis based on gauge observations, *J Hydrometeorol*, 3, 249-266, Doi 10.1175/1525-7541(2002)003<0249:Glpaym>2.0.Co;2, 2002.
- Claverie, M., Vermote, E., and NOAA-CDR-Program: NOAA Climate Data Record (CDR) of Leaf Area Index (LAI) and Fraction of Absorbed Photosynthetically Active Radiation (FAPAR), Version 4, NOAA National Climatic Data Center, 10.7289/V5M043BX, 2014.
- Claverie, M., Matthews, J. L., Vermote, E. F., and Justice, C. O.: A 30+ Year AVHRR LAI and FAPAR Climate Data Record: Algorithm Description and Validation, *Remote Sens-Basel*, 8, 10.3390/rs8030263, 2016.
- Colby, F. P.: Convective Inhibition as a Predictor of Convection during Ave-Sesame-II, *Mon Weather Rev*, 112, 2239-2252, Doi 10.1175/1520-0493(1984)112<2239:Ciaapo>2.0.Co;2, 1984.

619 Cook, B. I., Ault, T. R., and Smerdon, J. E.: Unprecedented 21st century drought risk in  
620 the American Southwest and Central Plains, *Science Advances*, 1, 1-7,  
621 10.1126/sciadv.1400082 2015.

622 Creamean, J. M., Spackman, J. R., Davis, S. M., and White, A. B.: Climatology of long-  
623 range transported Asian dust along the West Coast of the United States, *J*  
624 *Geophys Res-Atmos*, 119, 12171-12185, 10.1002/2014jd021694, 2014.

625 Crooks, J. L., Cascio, W. E., Percy, M. S., Reyes, J., Neas, L. M., and Hilborn, E. D.: The  
626 Association between Dust Storms and Daily Non-Accidental Mortality in the  
627 United States, 1993-2005, *Environ Health Persp*, 124, 1735-1743,  
628 10.1289/Ehp216, 2016.

629 Cuesta, J., Marsham, J. H., Parker, D. J., and Flamant, C.: Dynamical mechanisms  
630 controlling the vertical redistribution of dust and the thermodynamic structure of  
631 the West Saharan atmospheric boundary layer during summer, *Atmos Sci Lett*,  
632 10, 34-42, 10.1002/asl.207, 2009.

633 Dee, D. P., Uppala, S. M., Simmons, A. J., Berrisford, P., Poli, P., Kobayashi, S., Andrae,  
634 U., Balmaseda, M. A., Balsamo, G., Bauer, P., Bechtold, P., Beljaars, A. C. M.,  
635 van de Berg, L., Bidlot, J., Bormann, N., Delsol, C., Dragani, R., Fuentes, M.,  
636 Geer, A. J., Haimberger, L., Healy, S. B., Hersbach, H., Holm, E. V., Isaksen, L.,  
637 Kallberg, P., Kohler, M., Matricardi, M., McNally, A. P., Monge-Sanz, B. M.,  
638 Morcrette, J. J., Park, B. K., Peubey, C., de Rosnay, P., Tavolato, C., Thepaut, J.  
639 N., and Vitart, F.: The ERA-Interim reanalysis: configuration and performance of  
640 the data assimilation system, *Q J Roy Meteor Soc*, 137, 553-597, 10.1002/qj.828,  
641 2011.



642 Delworth, T. L., Zeng, F. R., Rosati, A., Vecchi, G. A., and Wittenberg, A. T.: A Link  
 643 between the Hiatus in Global Warming and North American Drought, *J Climate*,  
 644 28, 3834-3845, 10.1175/Jcli-D-14-00616.1, 2015.

645 Duce, R. A.: Sources, distributions, and fluxes of mineral aerosols and their relationship  
 646 to climate, in: *Dalhousie Workshop on Aerosol Forcing of Climate*, edited by:  
 647 Charlson, R. J., and Heintzenberg, J., John Wiley, New York, 43-72, 1995.

648 Fischer, E. V., Hsu, N. C., Jaffe, D. A., Jeong, M. J., and Gong, S. L.: A decade of dust:  
 649 Asian dust and springtime aerosol load in the US Pacific Northwest, *Geophys Res*  
 650 *Lett*, 36, 10.1029/2008gl036467, 2009.

651 Gettelman, A., Seidel, D. J., Wheeler, M. C., and Ross, R. J.: Multidecadal trends in  
 652 tropical convective available potential energy, *J Geophys Res-Atmos*, 107,  
 653 10.1029/2001jd001082, 2002.

654 Gillette, D. A., and Passi, R.: Modeling Dust Emission Caused by Wind Erosion, *J*  
 655 *Geophys Res-Atmos*, 93, 14233-14242, DOI 10.1029/JD093iD11p14233, 1988.

656 Ginoux, P., Prospero, J. M., Gill, T. E., Hsu, N. C., and Zhao, M.: Global-Scale  
 657 Attribution of Anthropogenic and Natural Dust Sources and Their Emission Rates  
 658 Based on Modis Deep Blue Aerosol Products, *Rev Geophys*, 50,  
 659 10.1029/2012rg000388, 2012.

660 Hand, J. L., Copeland, S. A., Day, D. E., Dillner, A. M., Indresand, H., Malm, W. C.,  
 661 McDade, C. E., Moore, C. T., Pitchford, M. L., Schichtel, B. A., and Watson, J.  
 662 G.: IMPROVE (Interagency Monitoring of Protected Visual Environments):  
 663 Spatial and seasonal patterns and temporal variability of haze and its constituents  
 664 in the United States, 2011.

665 Hand, J. L., Schichtel, B. A., Pitchford, M., Malm, W. C., and Frank, N. H.: Seasonal  
 666 composition of remote and urban fine particulate matter in the United States, J  
 667 Geophys Res-Atmos, 117, 10.1029/2011jd017122, 2012.

668 Hand, J. L., White, W. H., Gebhart, K. A., Hyslop, N. P., Gill, T. E., and Schichtel, B. A.:  
 669 Earlier onset of the spring fine dust season in the southwestern United States,  
 670 Geophys Res Lett, 43, 4001-4009, 10.1002/2016gl068519, 2016.

671 Hand, J. L., Gill, T. E., and Schichtel, B. A.: Spatial and seasonal variability in fine  
 672 mineral dust and coarse aerosol mass at remote sites across the United States, J  
 673 Geophys Res-Atmos, 122, 3080-3097, 10.1002/2016jd026290, 2017.

674 Helfand, H. M., and Schubert, S. D.: Climatology of the Simulated Great-Plains Low-  
 675 Level Jet and Its Contribution to the Continental Moisture Budget of the United-  
 676 States, J Climate, 8, 784-806, Doi 10.1175/1520-  
 677 0442(1995)008<0784:Cotsgp>2.0.Co;2, 1995.

678 Hyslop, N. P., Trzepla, K., and White, W. H.: Assessing the Suitability of Historical  
 679 PM<sub>2.5</sub> Element Measurements for Trend Analysis, Environ Sci Technol, 49,  
 680 9247-9255, 10.1021/acs.est.5b01572, 2015.

681 Kok, J. F.: A scaling theory for the size distribution of emitted dust aerosols suggests  
 682 climate models underestimate the size of the global dust cycle, P Natl Acad Sci  
 683 USA, 108, 1016-1021, 10.1073/pnas.1014798108, 2011.

684 Li, F. Y., Ginoux, P., and Ramaswamy, V.: Transport of Patagonian dust to Antarctica, J  
 685 Geophys Res-Atmos, 115, 10.1029/2009jd012356, 2010.

686 Li, L. F., Li, W. H., and Kushnir, Y.: Variation of the North Atlantic subtropical high  
 687 western ridge and its implication to Southeastern US summer precipitation, *Clim*  
 688 *Dynam*, 39, 1401-1412, 10.1007/s00382-011-1214-y, 2012a.

689 Li, W. H., Li, L. F., Ting, M. F., and Liu, Y. M.: Intensification of Northern Hemisphere  
 690 subtropical highs in a warming climate, *Nat Geosci*, 5, 830-834,  
 691 10.1038/Ngeo1590, 2012b.

692 Liu, Y. M., Wu, G. X., and Ren, R. C.: Relationship between the subtropical anticyclone  
 693 and diabatic heating, *J Climate*, 17, 682-698, Doi 10.1175/1520-  
 694 0442(2004)017<0682:Rbtsaa>2.0.Co;2, 2004.

695 Malm, W. C., Sisler, J. F., Huffman, D., Eldred, R. A., and Cahill, T. A.: Spatial and  
 696 Seasonal Trends in Particle Concentration and Optical Extinction in the United-  
 697 States, *J Geophys Res-Atmos*, 99, 1347-1370, Doi 10.1029/93jd02916, 1994.

698 Marsham, J. H., Parker, D. J., Grams, C. M., Taylor, C. M., and Haywood, J. M.: Uplift  
 699 of Saharan dust south of the intertropical discontinuity, *J Geophys Res-Atmos*,  
 700 113, 10.1029/2008jd009844, 2008.

701 Marticorena, B., and Bergametti, G.: Modeling the Atmospheric Dust Cycle .1. Design of  
 702 a Soil-Derived Dust Emission Scheme, *J Geophys Res-Atmos*, 100, 16415-16430,  
 703 Doi 10.1029/95jd00690, 1995.

704 Mesinger, F., DiMego, G., Kalnay, E., Mitchell, K., Shafran, P. C., Ebisuzaki, W., Jovic,  
 705 D., Woollen, J., Rogers, E., Berbery, E. H., Ek, M. B., Fan, Y., Grumbine, R.,  
 706 Higgins, W., Li, H., Lin, Y., Manikin, G., Parrish, D., and Shi, W.: North  
 707 American regional reanalysis, *B Am Meteorol Soc*, 87, 343-360, 10.1175/Bams-  
 708 87-3-343, 2006.

709 Miyasaka, T., and Nakamura, H.: Structure and formation mechanisms of the northern  
710 hemisphere summertime subtropical highs, *J Climate*, 18, 5046-5065, Doi  
711 10.1175/Jcli3599.1, 2005.

712 Morman, S. A., and Plumlee, G. S.: The role of airborne mineral dusts in human disease,  
713 *Aeolian Res*, 9, 203-212, 10.1016/j.aeolia.2012.12.001, 2013.

714 Myoung, B., and Nielsen-Gammon, J. W.: Sensitivity of Monthly Convective  
715 Precipitation to Environmental Conditions, *J Climate*, 23, 166-188,  
716 10.1175/2009jcli2792.1, 2010a.

717 Myoung, B., and Nielsen-Gammon, J. W.: The Convective Instability Pathway to Warm  
718 Season Drought in Texas. Part I: The Role of Convective Inhibition and Its  
719 Modulation by Soil Moisture, *J Climate*, 23, 4461-4473, 10.1175/2010jcli2946.1,  
720 2010b.

721 O'Brien, R. M.: A caution regarding rules of thumb for variance inflation factors, *Qual*  
722 *Quant*, 41, 673-690, 10.1007/s11135-006-9018-6, 2007.

723 Perry, K. D., Cahill, T. A., Eldred, R. A., Dutcher, D. D., and Gill, T. E.: Long-range  
724 transport of North African dust to the eastern United States, *J Geophys Res-*  
725 *Atmos*, 102, 11225-11238, Doi 10.1029/97jd00260, 1997.

726 Prein, A. F., Holland, G. J., Rasmussen, R. M., Clark, M. P., and Tye, M. R.: Running  
727 dry: The US Southwest's drift into a drier climate state, *Geophys Res Lett*, 43,  
728 1272-1279, 10.1002/2015gl066727, 2016.

729 Prospero, J. M.: Long-term measurements of the transport of African mineral dust to the  
730 southeastern United States: Implications for regional air quality, *J Geophys Res-*  
731 *Atmos*, 104, 15917-15927, Doi 10.1029/1999jd900072, 1999a.

732 Prospero, J. M.: Long-range transport of mineral dust in the global atmosphere: Impact of  
 733 African dust on the environment of the southeastern United States, *P Natl Acad*  
 734 *Sci USA*, 96, 3396-3403, DOI 10.1073/pnas.96.7.3396, 1999b.  
 735 Prospero, J. M., Landing, W. M., and Schulz, M.: African dust deposition to Florida:  
 736 Temporal and spatial variability and comparisons to models, *J Geophys Res-*  
 737 *Atmos*, 115, 10.1029/2009jd012773, 2010.  
 738 Prospero, J. M., Collard, F. X., Molinie, J., and Jeannot, A.: Characterizing the annual  
 739 cycle of African dust transport to the Caribbean Basin and South America and its  
 740 impact on the environment and air quality, *Global Biogeochem Cy*, 28, 757-773,  
 741 10.1002/2013gb004802, 2014.  
 742 Pu, B., and Dickinson, R. E.: Diurnal Spatial Variability of Great Plains Summer  
 743 Precipitation Related to the Dynamics of the Low-Level Jet, *J Atmos Sci*, 71,  
 744 1807-1817, 10.1175/Jas-D-13-0243.1, 2014.  
 745 Pu, B., Dickinson, R. E., and Fu, R.: Dynamical connection between Great Plains low-  
 746 level winds and variability of central Gulf States precipitation, *J Geophys Res-*  
 747 *Atmos*, 121, 3421-3434, 10.1002/2015jd024045, 2016.  
 748 Pu, B., and Ginoux, P.: Projection of American dustiness in the late 21st century due to  
 749 climate change, *Scientific Reports*, 7:5553, 1-10, 10.1038/s41598-017-05431-9,  
 750 2017.  
 751 Reid, J. S., Jonsson, H. H., Maring, H. B., Smirnov, A., Savoie, D. L., Cliff, S. S., Reid,  
 752 E. A., Livingston, J. M., Meier, M. M., Dubovik, O., and Tsay, S. C.: Comparison  
 753 of size and morphological measurements of coarse mode dust particles from  
 754 Africa, *J Geophys Res-Atmos*, 108, 10.1029/2002jd002485, 2003.

755 Riemann-Campe, K., Fraedrich, K., and Lunkeit, F.: Global climatology of Convective  
 756 Available Potential Energy (CAPE) and Convective Inhibition (CIN) in ERA-40  
 757 reanalysis, *Atmos Res*, 93, 534-545, 10.1016/j.atmosres.2008.09.037, 2009.

758 Ruane, A. C.: NARR's Atmospheric Water Cycle Components. Part I: 20-Year Mean and  
 759 Annual Interactions, *J Hydrometeorol*, 11, 1205-1219, 10.1175/2010jhm1193.1,  
 760 2010a.

761 Ruane, A. C.: NARR's Atmospheric Water Cycle Components. Part II: Summertime  
 762 Mean and Diurnal Interactions, *J Hydrometeorol*, 11, 1220-1233,  
 763 10.1175/2010jhm1279.1, 2010b.

764 Ruiz-Barradas, A., and Nigam, S.: Great plains hydroclimate variability: The view from  
 765 North American regional reanalysis, *J Climate*, 19, 3004-3010, Doi  
 766 10.1175/Jcli3768.1, 2006.

767 Sassen, K.: The Polarization Lidar Technique for Cloud Research - a Review and Current  
 768 Assessment, *B Am Meteorol Soc*, 72, 1848-1866, Doi 10.1175/1520-  
 769 0477(1991)072<1848:Tpltfc>2.0.Co;2, 1991.

770 Seager, R., Ting, M. F., Held, I., Kushnir, Y., Lu, J., Vecchi, G., Huang, H. P., Harnik,  
 771 N., Leetmaa, A., Lau, N. C., Li, C. H., Velez, J., and Naik, N.: Model projections  
 772 of an imminent transition to a more arid climate in southwestern North America,  
 773 *Science*, 316, 1181-1184, 10.1126/science.1139601, 2007.

774 Song, J., Liao, K., Coulter, R. L., and Lesht, B. M.: Climatology of the low-level jet at  
 775 the southern Great Plains atmospheric Boundary Layer Experiments site, *J Appl  
 776 Meteorol*, 44, 1593-1606, Doi 10.1175/Jam2294.1, 2005.

777 Sorooshian, A., Wonaschutz, A., Jarjour, E. G., Hashimoto, B. I., Schichtel, B. A., and  
778 Betterton, E. A.: An aerosol climatology for a rapidly growing arid region  
779 (southern Arizona): Major aerosol species and remotely sensed aerosol properties,  
780 J Geophys Res-Atmos, 116, 10.1029/2011jd016197, 2011.

781 Tong, D. Q., Wang, J. X. L., Gill, T. E., Lei, H., and Wang, B. Y.: Intensified dust storm  
782 activity and Valley fever infection in the southwestern United States, Geophys  
783 Res Lett, 44, 4304-4312, 10.1002/2017gl073524, 2017.

784 Walters, C. K., and Winkler, J. A.: Airflow configurations of warm season southerly low-  
785 level wind maxima in the Great Plains. Part I: spatial and temporal characteristics  
786 and relationship to convection, Weather Forecast, 16, 513-530, Doi  
787 10.1175/1520-0434(2001)016<0513:Acowss>2.0.Co;2, 2001.

788 Weaver, S. J., and Nigam, S.: Variability of the great plains low-level jet: Large-scale  
789 circulation context and hydroclimate impacts, J Climate, 21, 1532-1551,  
790 10.1175/2007jcli1586.1, 2008.

791 Winker, D. M., Hunt, W., and Hostetler, C.: Status and performance of the CALIOP  
792 lidar, Bba Lib, 5575, 8-15, 10.1117/12.571955, 2004.

793 Winker, D. M., Hunt, W. H., and McGill, M. J.: Initial performance assessment of  
794 CALIOP, Geophys Res Lett, 34, 10.1029/2007gl030135, 2007.

795 Wu, G. X., and Liu, Y. M.: Summertime quadruplet heating pattern in the subtropics and  
796 the associated atmospheric circulation, Geophys Res Lett, 30,  
797 10.1029/2002gl016209, 2003.

798 Ye, B., Del Genio, A. D., and Lo, K. K. W.: CAPE variations in the current climate and  
799 in a climate change, J Climate, 11, 1997-2015, Doi 10.1175/1520-0442-  
800 11.8.1997, 1998.

801 Yu, H. B., Remer, L. A., Chin, M., Bian, H. S., Tan, Q., Yuan, T. L., and Zhang, Y.:  
802 Aerosols from Overseas Rival Domestic Emissions over North America, Science,  
803 337, 566-569, 10.1126/science.1217576, 2012.

804 Zender, C. S., Bian, H. S., and Newman, D.: Mineral Dust Entrainment and Deposition  
805 (DEAD) model: Description and 1990s dust climatology, J Geophys Res-Atmos,  
806 108, 10.1029/2002jd002775, 2003.

807 Zhang, L., Henze, D. K., Grell, G. A., Torres, O., Jethva, H., and Lamsal, L. N.: What  
808 factors control the trend of increasing AAOD over the United States in the last  
809 decade?, J. Geophys. Res. Atmos, 122, 1797-1810, 10.1002/2016JD025472,  
810 2017.

811 Zhu, J. H., and Liang, X. Z.: Impacts of the Bermuda High on Regional Climate and  
812 Ozone over the United States, J Climate, 26, 1018-1032, 10.1175/Jcli-D-12-  
813 00168.1, 2013.

814

815

816

817



Table 1 Correlations between friction velocity ( $U^*$ ) and CIN, CIN and 2 meter temperature ( $T_{2m}$ ),  $T_{2m}$  and  $U^*$ ,  $T_{700}-T_{dp}$  (the differences between air temperature at 700 hPa and 2m dew point temperature) and CIN,  $T_{700}-T_{dp}$  and  $U^*$  for all days in JJA from 2002 to 2015 (1288 days), days when fine dust concentration is available (431 days), and dusty days (52 days). All values are significant at the 95% confidence level (t-test) except those listed in italic.

Table 2 Correlations between  $U^*$  and CIN, CIN and vertical wind speed at 850 hPa ( $w_{850}$ ),  $w_{850}$  and  $U^*$  during dusty days in JJA from 2002 to 2015. All values are significant at the 95% confidence level except the value significant at the 90% confidence level is labeled with a “+” (t-test).

Figure 1. Trend (shading) of fine dust concentration ( $\mu\text{g m}^{-3}$ ) from 1990 to 2015 in (a) DJF, (b) MAM, (c) JJA, and (d) SON from IMPROVE gridded data. Dotted areas are significant at the 95% confidence level. The colored circles show the trend at IMPROVE stations with consecutive records for at least 23 years during 1990-2015. Circles with green outlines denote that the trend is significant at the 90% confidence level. Black boxes denote the averaging areas of the southwestern U.S. (left) and the Great Plains (right).

Figure 2. (a)-(d) Multiple linear regression coefficients calculated by regressing fine dust concentration from 1990-2015 onto standardized precipitation (purple), bareness (orange), and surface wind (green). Color denotes the most influential factor at each grid (i.e., the largest regression coefficient in absolute value among the three), while saturation of the color shows the magnitude of the coefficient (0 to 0.3). Areas significant at the 95% confidence levels are dotted. (e) Bar-plot showing the correlations between observed regional mean fine dust concentration and the reconstructed concentration using 3, 4, and 5 controlling factors (light, median, and deep blue), and pattern correlation between trends from the observation and from reconstructed fine dust using 3, 4, and 5 factors (light, medium, and deep pink) in the Great Plains (GP) and the southwestern U.S. (WST, black boxes in Fig. 1). “3-factor” denotes precipitation, bareness, and surface wind, “4-factor” denotes precipitation, bareness, surface wind, and CIN, “5-factor” denotes precipitation, bareness, surface wind, CIN, and CAPE.

Figure 3. (a) Observed (Obs) and reconstructed (Reg) trends of fine dust concentration ( $\mu\text{g m}^{-3}$ ) using three factors in spring from 1990 to 2015. The contributions from each factor (precipitation, bareness, and surface wind) to the overall reconstructed trend are also shown (second row). Dotted areas are significant at the 90% confidence level. Pattern correlation between reconstructed dust concentration trends and observed trends are shown at the top right corner of each plot. Black box denotes the southwestern U.S. (WST). (b) Time series of fine dust concentration (cyan) and precipitation (purple) averaged over the WST and their linear trends (dashed lines; values are listed at bottom left) in spring from 1990 to 2015. Gray shading denotes  $\pm$ one standard error of the observations. The correlation between fine dust and precipitation is also listed at the bottom in purple.

Figure 4. (a) Observed (Obs) and reconstructed (Reg) trends of fine dust concentration ( $\mu\text{g m}^{-3}$ ) using five factors in summer from 1990-2015. The contributions from each factor (precipitation, bareness, surface wind, CAPE, and CIN) are also shown (second and third rows). Dotted areas are significant at the 90% confidence level. Pattern correlation between reconstructed dust concentration trends and the observed trends are shown at the right corner of each plot. Black box denotes the central Great Plains (CGP). (b) Time series of fine dust concentration (cyan), CIN (orange), and CAPE (deep blue) averaged over the CGP and their linear trends (dashed lines). Gray shading denotes  $\pm$ one standard error of the observations. (c) Time series of  $T_{700}-T_{dp}$  (black),  $T_{700}$  (green) and  $T_{dp}$  (light blue) and their linear trends (dashed lines) in summer from 1990 to 2015.

Figure 5. (a) Time series of fine dust concentration ( $\mu\text{g m}^{-3}$ ) averaged in the CGP (cyan) and the index of the Great Plains low-level jet (magenta) and their trends (dashed line) in JJA from 1990 to 2015. Gray shading denotes  $\pm$ one standard error of the observations. Correlations between the jet index and fine dust concentration, CIN, and near surface wind speed for (b) 1990-2015 and (c) 2002-2015. Colored circles denotes correlations at IMPROVE stations, with green outlines denotes the correlation is significant at the 90% confidence level. Areas significant at the 95% confidence level are dotted in (b) and significant at the 90% confidence level are dotted in (c).

Figure 6. Scatter plot of standardized friction velocity ( $U^*$ ) and CIN anomalies for (a) all days in JJA from 2002-2015, (b) days when fine dust data is available, and (c) dusty days (when daily fine dust concentration anomaly is greater than one standard deviation).

Figure 7. Nighttime 532 nm total attenuated backscatter (shading) and depolarization ratio (black contours, values  $\geq 0.2$  are shown) from CALIOP on August 10<sup>th</sup>, 2007 (top left) and on June 21<sup>st</sup>, 2013 (bottom left), along with fine dust concentration anomaly ( $\mu\text{g m}^{-3}$ ; shading, right column) and CIN anomaly (blue contour, only negative values from -60 to -120  $\text{J kg}^{-1}$  are shown). CALIOP orbit tracks are shown in grey lines (right column) with cyan part and sampling points (A-F) denote the cross-section shown on the left column.

Figure 8. Same as Fig. 10 but for July 2<sup>nd</sup>, 2011 (top) and July 2<sup>nd</sup>, 2012 (bottom). Only positive CIN anomalies from 25 to 50  $\text{J kg}^{-1}$  are shown (light purple contour).

Figure 9. Daily composites of the anomalies of (a) fine dust concentration ( $\mu\text{g m}^{-3}$ ), (b) CIN ( $\text{J kg}^{-1}$ ), (c) CAPE ( $\text{J kg}^{-1}$ ), (d) 900 hPa wind speed ( $\text{m s}^{-1}$ ), (e) 10 m wind speed ( $\text{m s}^{-1}$ ), (f)  $U^*$  ( $\text{m s}^{-1}$ ), (g) total precipitation ( $\text{mm day}^{-1}$ ), (h) convective precipitation ( $\text{mm day}^{-1}$ ), and (i) total cloud cover (%) during dusty days in JJA from 2002 to 2015. Dotted areas are significant at the 95% confidence level. 900 hPa and 10 m wind anomalies (green vectors) significant at the 95% confidence level are shown in (d) and (e).

Figure 10. Daily composite of vertical velocity (shading;  $10^{-2} \text{ m s}^{-1}$ ), potential temperature (grey contours; K), and specific humidity (purple contours;  $\text{g kg}^{-1}$ ) from the ERA-Interim, and fine dust concentration anomalies (bottom; orange line) averaged between  $95^\circ$  and  $102^\circ$  W for dusty days in JJA from 2002 to 2015. Topography is masked out in grey. Cyan lines denote the domain of the CGP.

Figure 11. Daily composites of (a)  $T_{2\text{m}}$  (K) and (b) 850 hPa geopotential height (gpm) and horizontal wind vectors ( $\text{m s}^{-1}$ ; grey) from the ERA-Interim averaged over dusty days in JJA from 2002-2015. Blue and red contours denote 1560 geopotential height in the climatology (2002-2015) and during dusty days, respectively. Areas significant at the 95% confidence level are dotted. Wind vectors significant at the 95% confidence level are plotted in green.

Table 1 Correlations between friction velocity ( $U^*$ ) and CIN, CIN and 2 meter temperature ( $T_{2m}$ ),  $T_{2m}$  and  $U^*$ ,  $T_{700}-T_{dp}$  (the differences between air temperature at 700 hPa and 2m dew point temperature) and CIN,  $T_{700}-T_{dp}$  and  $U^*$  for all days in JJA from 2002 to 2015 (1288 days), days when fine dust concentration is available (431 days), and dusty days (52 days). All values are significant at the 95% confidence level (t-test) except those listed in italic.

| Variables                | All days in JJA | Available days | Dusty days  |
|--------------------------|-----------------|----------------|-------------|
| $U^*$ , CIN              | -0.54           | -0.54          | -0.44       |
| CIN, $T_{2m}$            | -0.59           | -0.59          | -0.39       |
| $T_{2m}$ , $U^*$         | 0.39            | 0.37           | <i>0.19</i> |
| CIN, $T_{700}-T_{dp}$    | -0.59           | -0.62          | -0.59       |
| $T_{700}-T_{dp}$ , $U^*$ | 0.37            | 0.38           | <i>0.14</i> |

Table 2 Correlations between  $U^*$  and CIN, CIN and vertical wind speed at 850 hPa ( $w_{850}$ ),  $w_{850}$  and  $U^*$  during dusty days in JJA from 2002 to 2015. All values are significant at the 95% confidence level except the value significant at the 90% confidence level is labeled with a “+” (t-test).

| Variables         | Dusty days        |
|-------------------|-------------------|
| $U^*$ , CIN       | -0.44             |
| CIN, $w_{850}$    | 0.28 <sup>+</sup> |
| $w_{850}$ , $U^*$ | -0.32             |

# Fine dust concentration trend (1990-2015)

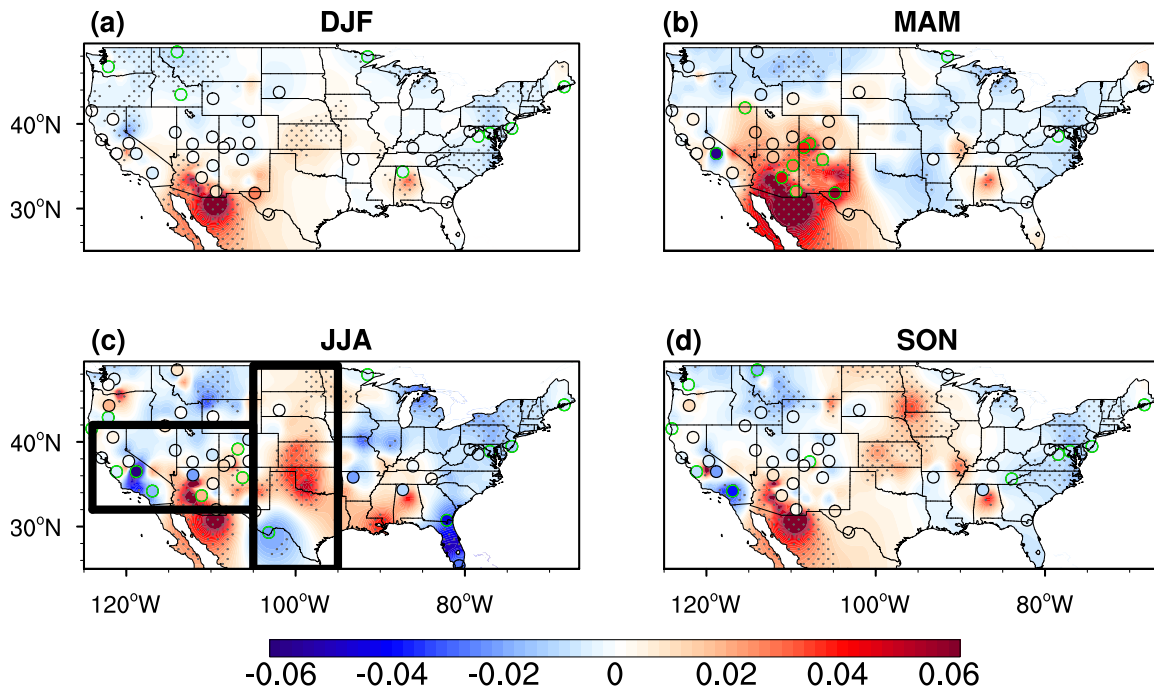

Figure 1. Trend (shading) of fine dust concentration ( $\mu\text{g m}^{-3}$ ) from 1990 to 2015 in (a) DJF, (b) MAM, (c) JJA, and (d) SON from IMPROVE gridded data. Dotted areas are significant at the 95% confidence level. The colored circles show the trend at IMPROVE stations with consecutive records for at least 23 years during 1990-2015. Circles with green outlines denote that the trend is significant at the 90% confidence level. Black boxes denote the averaging areas of the southwestern U.S. (left) and the Great Plains (right).

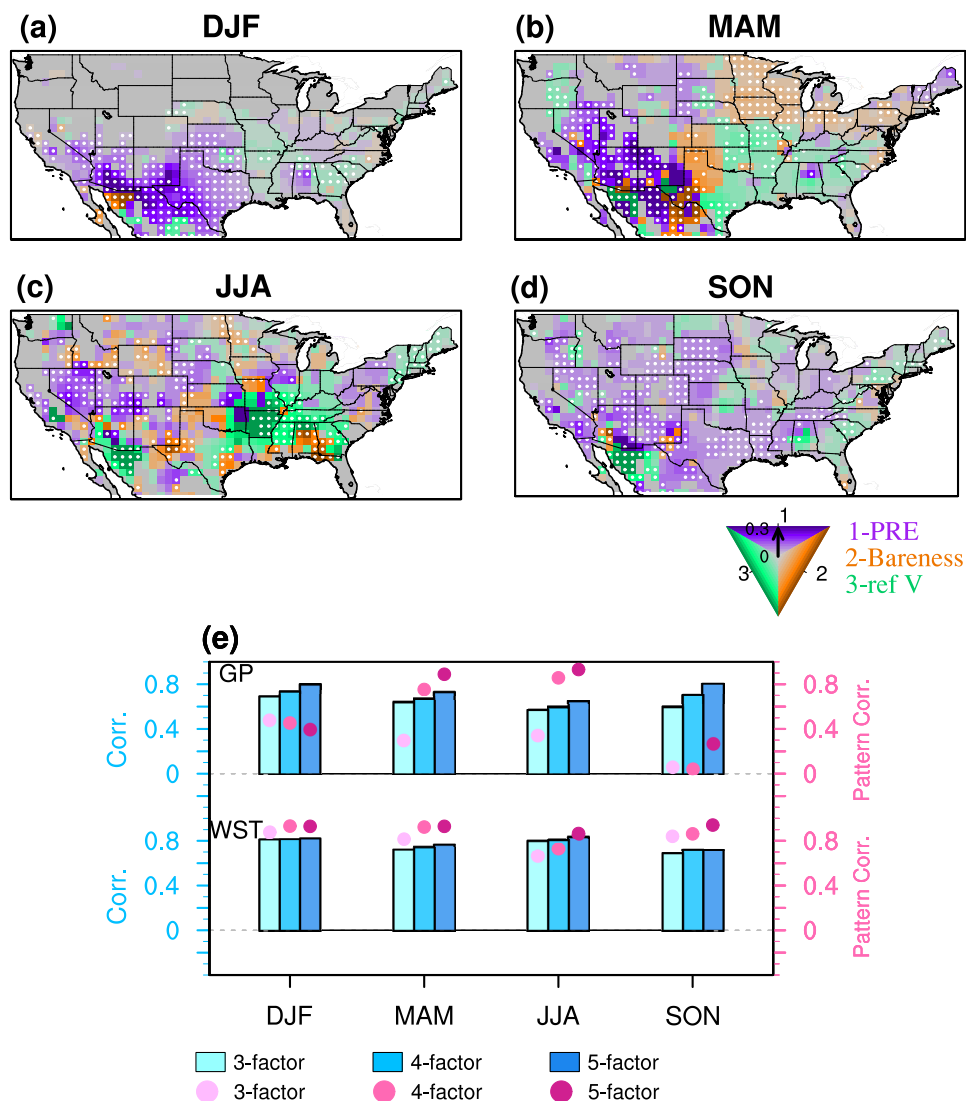

Figure 2. (a)-(d) Multiple linear regression coefficients calculated by regressing fine dust concentration from 1990-2015 onto standardized precipitation (purple), bareness (orange), and surface wind (green). Color denotes the most influential factor at each grid (i.e., the largest regression coefficient in absolute value among the three), while saturation of the color shows the magnitude of the coefficient (0 to 0.3). Areas significant at the 95% confidence levels are dotted. (e) Bar-plot showing the correlations between observed regional mean fine dust concentration and the reconstructed concentration using 3, 4, and 5 controlling factors (light, median, and deep blue), and pattern correlation between trends from the observation and from reconstructed fine dust using 3, 4, and 5 factors (light, medium, and deep pink) in the Great Plains (GP) and the southwestern U.S. (WST, black boxes in Fig. 1). “3-factor” denotes precipitation, bareness, and surface wind, “4-factor” denotes precipitation, bareness, surface wind, and CIN, “5-factor” denotes precipitation, bareness, surface wind, CIN, and CAPE.



(a) Obs and Reg fine dust trend (1990-2015 MAM)

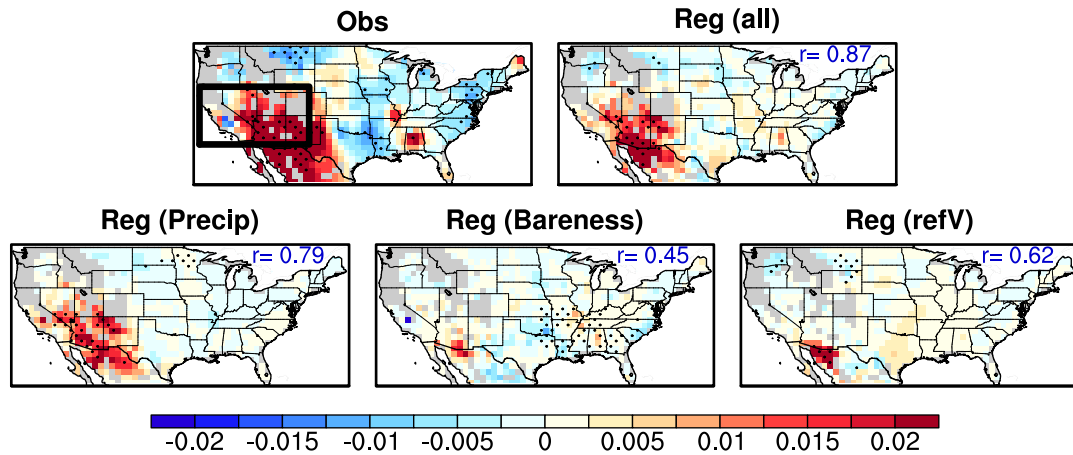

(b) WST fine dust and precipitation (MAM)

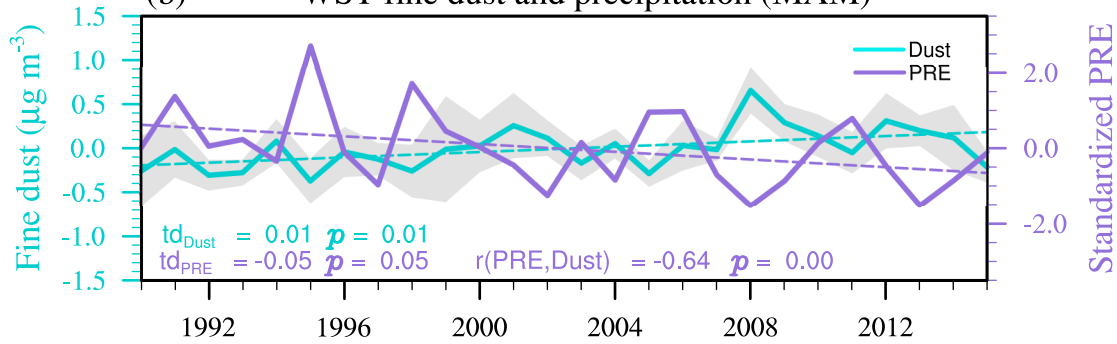

Figure 3. (a) Observed (Obs) and reconstructed (Reg) trends of fine dust concentration ( $\mu\text{g m}^{-3}$ ) using three factors in spring from 1990 to 2015. The contributions from each factor (precipitation, bareness, and surface wind) to the overall reconstructed trend are also shown (second row). Dotted areas are significant at the 90% confidence level. Pattern correlation between reconstructed dust concentration trends and observed trends are shown at the top right corner of each plot. Black box denotes the southwestern U.S. (WST). (b) Time series of fine dust concentration (cyan) and precipitation (purple) averaged over the WST and their linear trends (dashed lines; values are listed at bottom left) in spring from 1990 to 2015. Gray shading denotes  $\pm$ one standard error of the observations. The correlation between fine dust and precipitation is also listed at the bottom in purple.

(a) Obs and Reg fine dust trend (1990-2015 JJA)

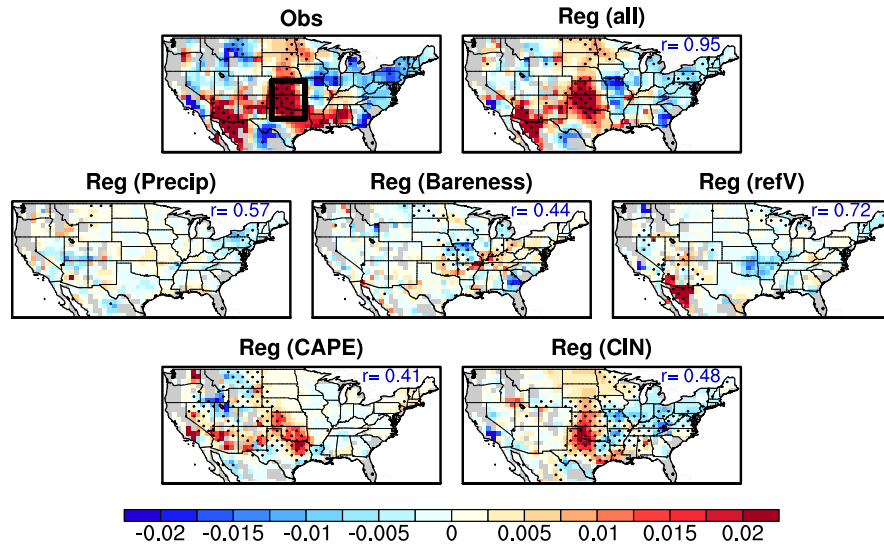

(b) CGP fine dust and influential factors (JJA)

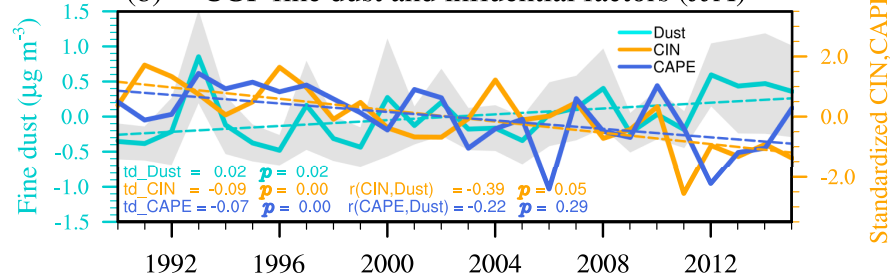

(c)  $T_{700}-T_{dp}$  (JJA)

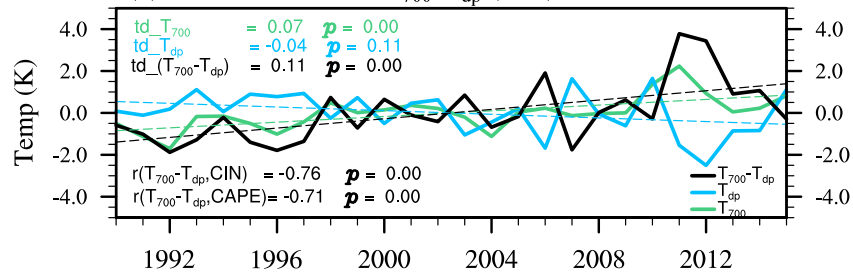

Figure 4. (a) Observed (Obs) and reconstructed (Reg) trends of fine dust concentration ( $\mu\text{g m}^{-3}$ ) using five factors in summer from 1990-2015. The contributions from each factor (precipitation, bareness, surface wind, CAPE, and CIN) are also shown (second and third rows). Dotted areas are significant at the 90% confidence level. Pattern correlation between reconstructed dust concentration trends and the observed trends are shown at the right corner of each plot. Black box denotes the central Great Plains (CGP). (b) Time series of fine dust concentration (cyan), CIN (orange), and CAPE (deep blue) averaged over the CGP and their linear trends (dashed lines). Gray shading denotes  $\pm$ one standard error of the observations. (c) Time series of  $T_{700}-T_{dp}$  (black),  $T_{700}$  (green) and  $T_{dp}$  (light blue) and their linear trends (dashed lines) in summer from 1990 to 2015.

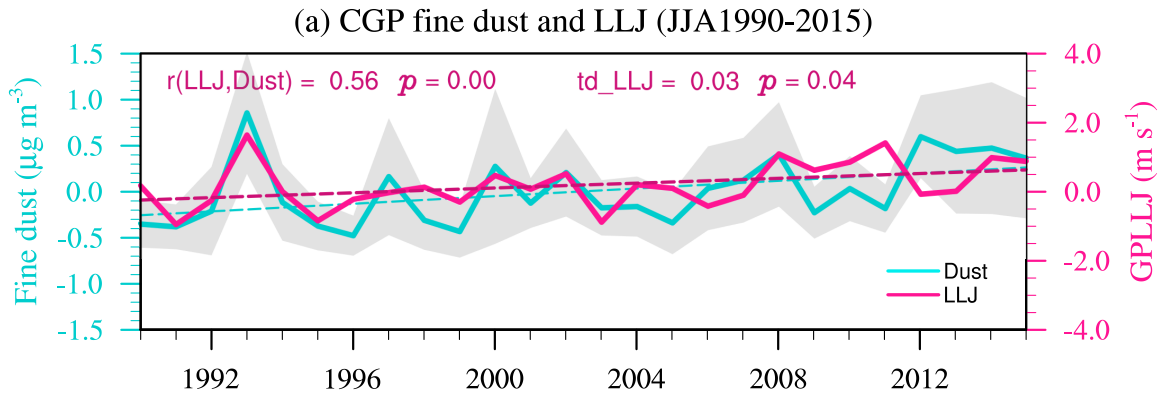

(b) Correlation with the LLJ (1990-2015)

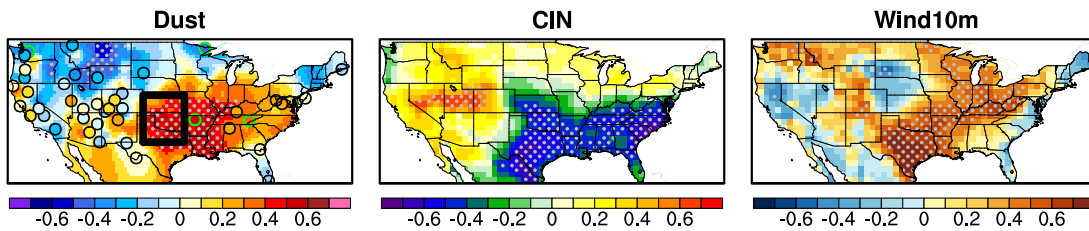

(c) Correlation with the LLJ (2002-2015)

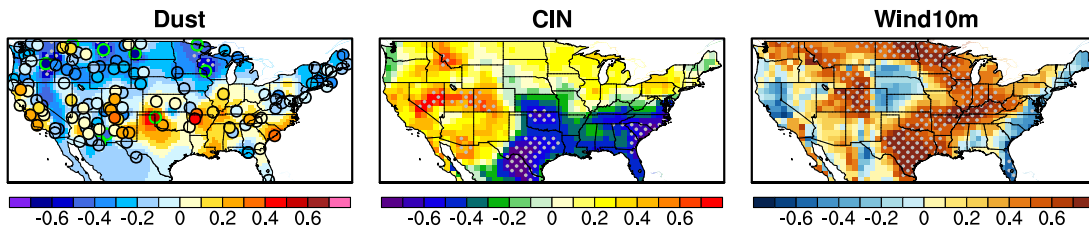

Figure 5. (a) Time series of fine dust concentration ( $\mu\text{g m}^{-3}$ ) averaged in the CGP (cyan) and the index of the Great Plains low-level jet (magenta) and their trends (dashed line) in JJA from 1990 to 2015. Gray shading denotes  $\pm$ one standard error of the observations. Correlations between the jet index and fine dust concentration, CIN, and near surface wind speed for (b) 1990-2015 and (c) 2002-2015. Colored circles denotes correlations at IMPROVE stations, with green outlines denotes the correlation is significant at the 90% confidence level. Areas significant at the 95% confidence level are dotted in (b) and significant at the 90% confidence level are dotted in (c).

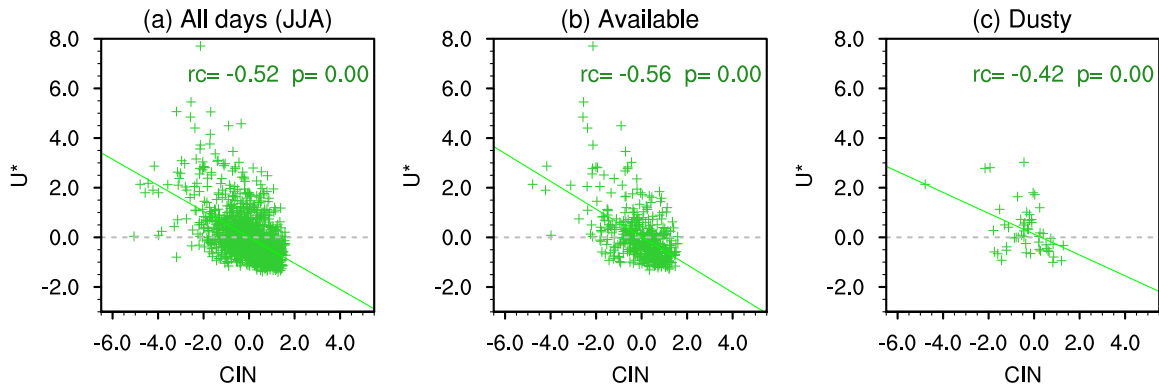

Figure 6. Scatter plot of standardized friction velocity ( $U^*$ ) and CIN anomalies for (a) all days in JJA from 2002-2015, (b) days when fine dust data is available, and (c) dusty days (when daily fine dust concentration anomaly is greater than one standard deviation).

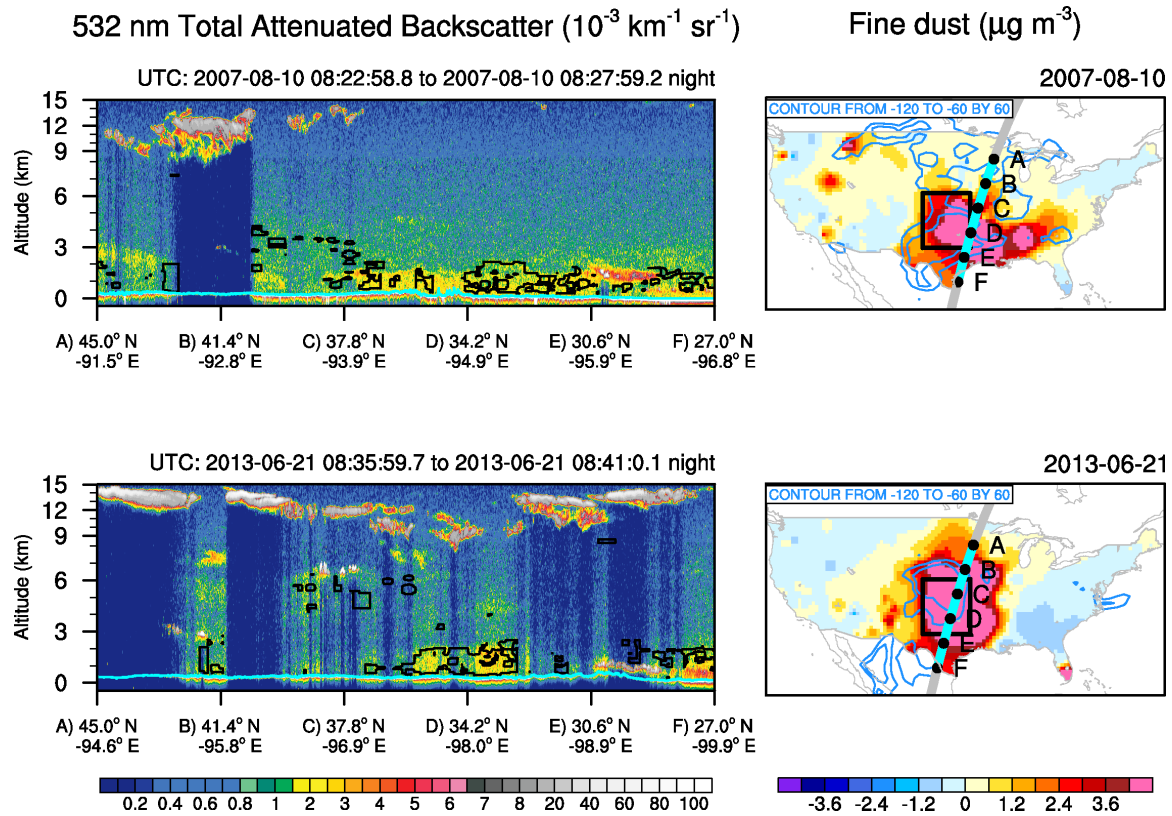

Figure 7. Nighttime 532 nm total attenuated backscatter (shading) and depolarization ratio (black contours, values  $\geq 0.2$  are shown) from CALIOP on August 10<sup>th</sup>, 2007 (top left) and on June 21<sup>st</sup>, 2013 (bottom left), along with fine dust concentration anomaly ( $\mu\text{g m}^{-3}$ ; shading, right column) and CIN anomaly (blue contour, only negative values from -60 to -120  $\text{J kg}^{-1}$  are shown). CALIOP orbit tracks are shown in grey lines (right column) with cyan part and sampling points (A-F) denote the cross-section shown on the left column.

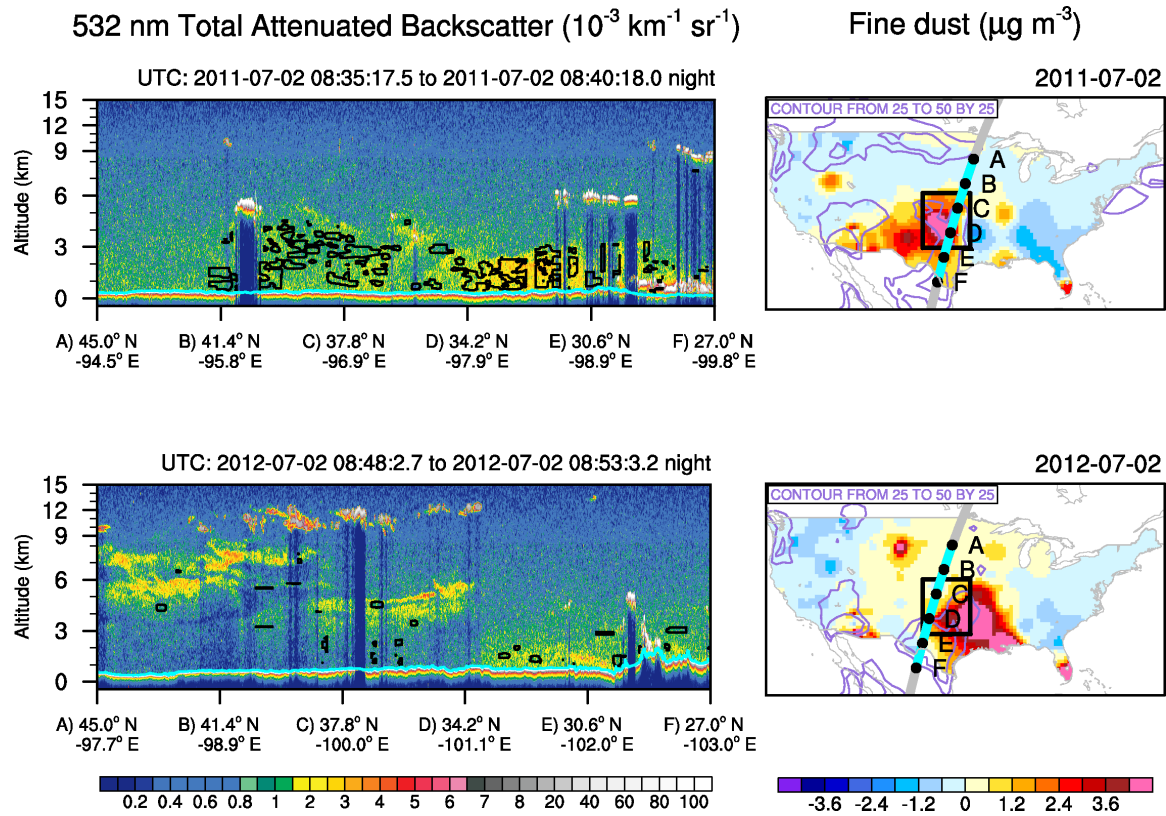

Figure 8. Same as Fig. 10 but for July 2<sup>nd</sup>, 2011 (top) and July 2<sup>nd</sup>, 2012 (bottom). Only positive CIN anomalies from 25 to 50  $\text{J kg}^{-1}$  are shown (light purple contour).



# Daily composite (amongJJA0215)

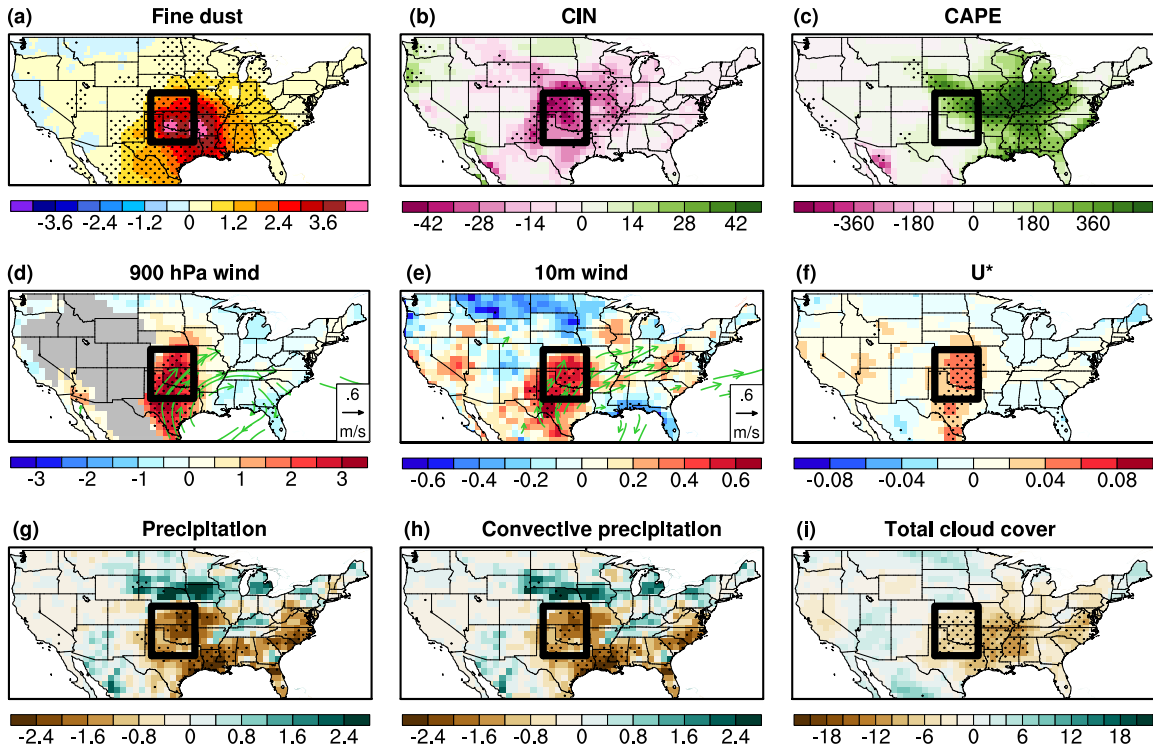

Figure 9. Daily composites of the anomalies of (a) fine dust concentration ( $\mu\text{g m}^{-3}$ ), (b) CIN ( $\text{J kg}^{-1}$ ), (c) CAPE ( $\text{J kg}^{-1}$ ), (d) 900 hPa wind speed ( $\text{m s}^{-1}$ ), (e) 10 m wind speed ( $\text{m s}^{-1}$ ), (f)  $U^*$  ( $\text{m s}^{-1}$ ), (g) total precipitation ( $\text{mm day}^{-1}$ ), (h) convective precipitation ( $\text{mm day}^{-1}$ ), and (i) total cloud cover (%) during dusty days in JJA from 2002 to 2015. Dotted areas are significant at the 95% confidence level. 900 hPa and 10 m wind anomalies (green vectors) significant at the 95% confidence level are shown in (d) and (e).

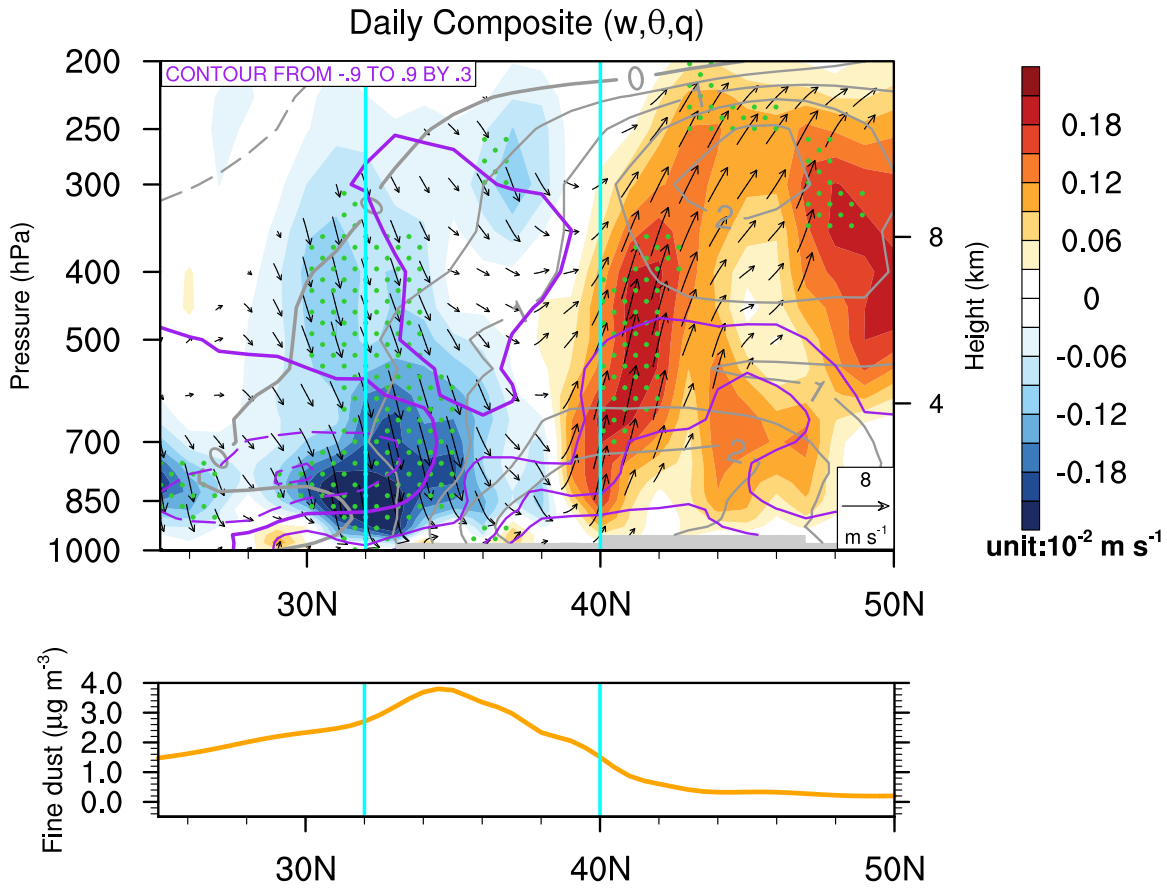

Figure 10. Daily composite of vertical velocity (shading;  $10^{-2} \text{ m s}^{-1}$ ), potential temperature (grey contours; K), and specific humidity (purple contours;  $\text{g kg}^{-1}$ ) from the ERA-Interim, and fine dust concentration anomalies (bottom; orange line) averaged between  $95^{\circ}$  and  $102^{\circ}$  W for dusty days in JJA from 2002 to 2015. Topography is masked out in grey. Cyan lines denote the domain of the CGP.



Daily composite (among JJA0215)

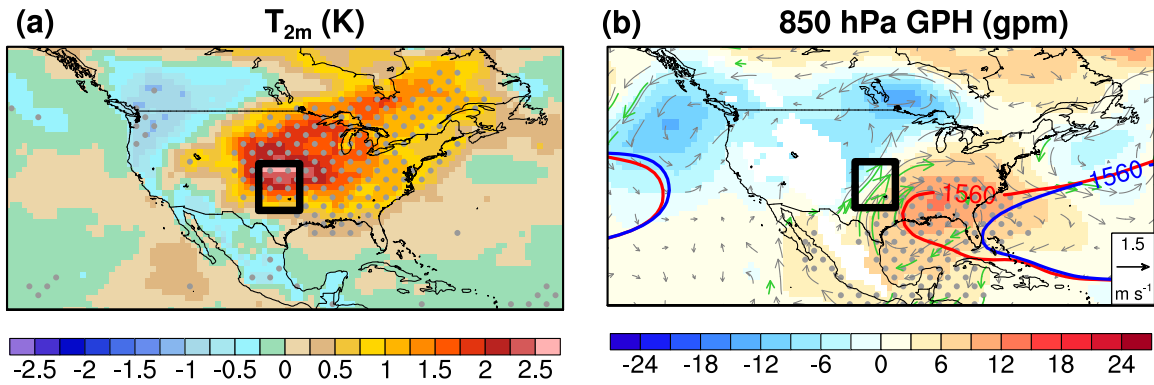

Figure 11. Daily composites of (a)  $T_{2m}$  (K) and (b) 850 hPa geopotential height (gpm) and horizontal wind vectors ( $m s^{-1}$ ; grey) from the ERA-Interim averaged over dusty days in JJA from 2002-2015. Blue and red contours denote 1560 geopotential height in the climatology (2002-2015) and during dusty days, respectively. Areas significant at the 95% confidence level are dotted. Wind vectors significant at the 95% confidence level are plotted in green.
